1 **Changes in presynaptic gene expression during homeostatic compensation**  
2 **at a central synapse**

3  
4 **Abbreviated title: Trans-synaptic regulation of gene expression**

5  
6 Evan R. Harrell<sup>1,2,\*</sup>, Diogo Pimentel<sup>1</sup>, Gero Miesenböck<sup>1,\*</sup>

7  
8 <sup>1</sup> Centre for Neural Circuits and Behaviour, University of Oxford, Tinsley Building,  
9 Mansfield Road, Oxford, OX1 3SR, United Kingdom.

10 <sup>2</sup> Present address: Institute Pasteur, INSERM, Hearing Institute, 63 rue de Charenton, F-  
11 75012 Paris, France.

12  
13 \* [evan-richard.harrell@pasteur.fr](mailto:evan-richard.harrell@pasteur.fr), [gero.miesenboeck@cncb.ox.ac.uk](mailto:gero.miesenboeck@cncb.ox.ac.uk)

14  
15 24 pages of text; 5 Figures; 12 Tables.

16 Word counts: abstract 204; introduction 542; discussion 1657

17  
18 **Acknowledgments:** This work was supported by grants from the Wellcome Trust  
19 (106988/Z/15/Z, 090309/Z/09/Z, 089270/Z/09/Z) and the Gatsby Charitable Foundation  
20 (GAT3237). Paul Overton provided advice on RNA isolation; Amélie Baud gave many  
21 helpful tips for the gene ontology analysis; Ruth Brain assisted with stock maintenance and  
22 dissections; and Jessica Beever helped with dissections and made delicious fly food (from  
23 the flies' perspective).

24  
25 **Declaration of Interests:** The authors declare no competing financial interests.

26 **Abstract**

27 Homeostatic matching of pre- and postsynaptic function has been observed in many species  
28 and neural structures, but whether transcriptional changes contribute to this form of trans-  
29 synaptic coordination remains unknown. To identify genes whose expression is altered in  
30 presynaptic neurons as a result of perturbing postsynaptic excitability, we applied a  
31 transcriptomics-friendly, temperature-inducible Kir2.1-based activity clamp at the first  
32 synaptic relay of the *Drosophila* olfactory system, a central synapse known to exhibit trans-  
33 synaptic homeostatic matching. Twelve hours after adult-onset suppression of activity in  
34 postsynaptic antennal lobe projection neurons, we detected changes in the expression of many  
35 genes in the third antennal segment, which houses the somata of presynaptic olfactory  
36 receptor neurons. These changes affected genes with roles in synaptic vesicle release and  
37 synaptic remodeling, including several genes implicated in homeostatic plasticity at the  
38 neuromuscular junction. At 48 hours and beyond, the transcriptional landscape was tilted  
39 toward proteostasis, energy metabolism, and cellular stress defenses, indicating that the  
40 system had been pushed to its homeostatic limits. Our data provide insights into the nature of  
41 homeostatic compensation at a central synapse and identify many genes engaged in synaptic  
42 homeostasis. The presynaptic transcriptional response to genetically targeted postsynaptic  
43 perturbations could be exploited for the construction of novel connectivity tracing tools.

44

45 **Significance Statement**

46

47 Homeostatic feedback mechanisms adjust intrinsic and synaptic properties of neurons to keep

48 their average activity levels constant. We show that, at a central synapse in the fruit fly brain,

49 these mechanisms include changes in presynaptic gene expression that are instructed by an

50 abrupt loss of postsynaptic excitability. The trans-synaptically regulated genes have roles in

51 synaptic vesicle release and synapse remodeling; protein synthesis, folding, and degradation;

52 and energy metabolism. Our analysis suggests that similar homeostatic machinery operates at

53 peripheral and central synapses, identifies some of its components, and potentially opens new

54 opportunities for the development of connectivity-based gene expression systems.

## 55 **Introduction**

56

57 Homeostatic feedback that stabilizes network activity after synaptic weight changes is an  
58 important adjunct to correlation-based learning rules (Turrigiano, 2011). Early demonstrations  
59 of homeostatic plasticity followed pharmacological manipulations of synaptic transmission in  
60 neuronal cultures (Turrigiano et al., 1994, 1998). When global activity levels were artificially  
61 increased or decreased, homeostatic forces intervened to maintain firing rates within defined  
62 ranges. These homeostatic forces are generated by two processes (Turrigiano, 2011): cell-  
63 autonomous changes in intrinsic excitability, which alter the gain of the neuronal voltage  
64 response to synaptic currents (Turrigiano et al., 1994; Desai et al., 1999); and adjustments of  
65 the synaptic strengths themselves (Petersen et al., 1997; Davis et al., 1998; Turrigiano et al.,  
66 1998; Burrone et al., 2002). These adjustments, though in principle also achievable in a cell-  
67 autonomous fashion by altering the density of neurotransmitter receptors in the postsynaptic  
68 membrane (Wierenga et al., 2005; Goold and Nicoll, 2010), often involve a trans-synaptic  
69 partnership in which postsynaptic neurons communicate deviations from their activity  
70 setpoint via retrograde signals to their presynaptic partners, which in turn increase or decrease  
71 transmitter release (Cull-Candy et al., 1980; Petersen et al., 1997; Sandrock et al., 1997; Davis  
72 et al., 1998; Burrone et al., 2002; Haghghi et al., 2003; Thiagarajan et al., 2005).

73

74 Much existing knowledge of retrograde communication comes from studies of the  
75 neuromuscular junction (NMJ). In mammals and *Drosophila*, mutations or autoantibodies that  
76 reduce the responsiveness of muscle to neurotransmitter cause compensatory increases in  
77 motor neuron vesicular release (Cull-Candy et al., 1980; Petersen et al., 1997; Sandrock et al.,  
78 1997; Davis et al., 1998). At the *Drosophila* NMJ, acute pharmacological receptor blockade  
79 (Frank et al., 2006) or expression of the inwardly rectifying potassium channel Kir2.1 in  
80 muscle (Paradis et al., 2001) induce similar presynaptic compensatory effects. While many

81 gene products and signaling pathways have been implicated in synaptic homeostasis (Davis  
82 and Müller, 2015), knowledge of the transcriptional changes that may be required to lock the  
83 presynaptic cells into their altered functional state remains scant (Marie et al., 2010).  
84  
85 Pre- and postsynaptic function are also matched at the central synapses between olfactory  
86 receptor neurons (ORNs) and projection neurons (PNs) in the antennal lobe of *Drosophila*  
87 (Kazama and Wilson, 2008), where the axons of 20–200 ORNs expressing the same odorant  
88 receptor connect to dendrites of an average of three affine PNs in a precise anatomical register  
89 (Groschner and Miesenböck, 2019). There is clear covariation between the dendritic arbor  
90 sizes of PNs belonging to different transmission channels and the amplitudes of unitary  
91 excitatory postsynaptic currents (EPSCs): the larger unitary EPSCs of PNs with larger  
92 dendritic trees—and, therefore, lower impedances—reflect homeostatic increases in the  
93 number of presynaptic ORN release sites in response to increased postsynaptic demand for  
94 synaptic drive (Kazama and Wilson, 2008; Mosca and Luo, 2014). This central model of  
95 synaptic homeostasis has been characterized physiologically and anatomically, but the  
96 molecular mechanisms of synaptic matching are unexplored. Taking advantage of the ease  
97 with which the presynaptic partners at this synapse can be isolated (they reside in an external  
98 appendage, the third antennal segment), we carried out a transcriptome-wide screen for genes  
99 regulated by retrograde homeostatic signals. Homeostatic plasticity was induced by adult-  
100 onset expression of Kir2.1 in PNs; the expression of a non-conducting mutant of Kir2.1  
101 (Kir2.1-nc) served as control.

## 102 **Methods**

103

### 104 **Drosophila strains and culture**

105 Flies were maintained at 21°C and 65% humidity on a constant 12:12-hour light:dark (LD)  
106 cycle in rich cornmeal and molasses-based food with brewer's yeast. Driver lines *GHI46-*  
107 *GAL4* (Stocker et al., 1997) and *pdf-GAL4* (Renn et al., 1999) were used to target the  
108 expression of codon-optimized *UAS-Kir2.1* transgenes (see below) to PNs and PDF-  
109 expressing clock neurons, respectively. Three copies of two *tubulin-GAL80<sup>ts</sup>* insertions on  
110 different chromosomes (McGuire et al., 2003) were combined to achieve tight repression of  
111 the GAL4-responsive transgenes until induction. The induction incubator was kept at 31°C in  
112 70% humidity on the same 12:12 LD schedule.

113

114 The cDNA sequence encoding human Kir2.1 was codon-optimized for *Drosophila* (GenBank  
115 accession number MW088713), synthesized at MWG Eurofins, and fused to a codon-  
116 optimized N-terminal EGFP tag. The non-conducting variant (Kir2.1-nc) was created by  
117 mutating codon 146 of the ion channel sequence from glycine to serine (GGA to AGC)  
118 (Haruna et al., 2007). The channel constructs replaced the mCD8::*GFP* coding sequence in  
119 derivatives of plasmid *pJFRC2-10XUAS-IVS-mCD8::*GFP** (Pfeiffer et al., 2010), which were  
120 inserted into the *attp2* landing site on the third autosome.

121

### 122 **Confocal microscopy**

123 Female flies aged 5 days were anesthetized on ice and dissected in phosphate-buffered saline  
124 (PBS; 1.86 mM NaH<sub>2</sub>PO<sub>4</sub>, 8.41 mM Na<sub>2</sub>HPO<sub>4</sub>, 175 mM NaCl). Immediately after dissection,  
125 brains were fixed in ice-cold PBS containing 4% (w/v) paraformaldehyde for 1–2 hours at  
126 room temperature, rinsed three times in ice-cold PBS containing 0.1% (w/v) Triton X-100

127 (PBT), washed three times for 20 minutes in ice-cold PBT, and mounted and cleared in  
128 Vectashield (Vector Labs). Confocal image stacks with an axial spacing of 1–1.5  $\mu\text{m}$  were  
129 collected on a Leica TCS SP5 microscope with an HCX IRAPO L 25x/0.95 W objective.

130

### 131 **Electrophysiology**

132 Targeted whole-cell patch-clamp recordings from the fluorescent somata of PNs expressing  
133 EGFP::Kir2.1 or EGFP::Kir2.1-nc were obtained through a small cranial window in 5-day old  
134 females. The brain was continuously superfused with extracellular solution containing 103  
135 mM NaCl, 3 mM KCl, 5 mM TES, 8 mM trehalose, 10 mM glucose, 7 mM sucrose, 26 mM  
136  $\text{NaHCO}_3$ , 1 mM  $\text{NaH}_2\text{PO}_4$ , 1.5 mM  $\text{CaCl}_2$ , 4 mM  $\text{MgCl}_2$  (pH 7.3) and equilibrated with 95%  
137  $\text{O}_2$ –5%  $\text{CO}_2$ . Borosilicate glass electrodes (7–13  $\text{M}\Omega$ ) were filled with intracellular solution  
138 containing 140 mM potassium aspartate, 10 mM HEPES, 1 mM KCl, 4 mM Mg-ATP, 0.5  
139 mM  $\text{Na}_3\text{GTP}$ , 1 mM EGTA (pH 7.3). Signals were acquired with a MultiClamp 700B  
140 Microelectrode Amplifier, filtered at 6–10 kHz, and digitized at 10–20 kHz with an ITC-18  
141 data acquisition board controlled by the Nclamp and NeuroMatic packages. Data were  
142 analyzed with NeuroMatic (<http://neuromatic.thinkrandom.com>) and custom procedures in  
143 Igor Pro (WaveMetrics) (Donlea et al., 2014). The membrane time constant was determined  
144 by fitting a single exponential to the voltage deflection caused by a 200-ms-long  
145 hyperpolarizing current pulse. Input resistances were estimated from linear fits of the  
146 subthreshold voltage deflections elicited by small current pulses of increasing amplitude and a  
147 duration of 1 s. Firing rates were quantified by holding cells at resting potentials of  $-60 \pm 2$   
148 mV and injecting sequences of depolarizing current pulses (5 pA increments, 1 s duration).  
149 Spikes were detected by finding minima in the second derivative of the membrane potential  
150 record. The spike rate was calculated by dividing the number of action potentials discharged  
151 by the time elapsed between the first and last spike. The current amplitude at which each cell

152 reached a given frequency threshold (1–50 Hz) was used to construct cumulative distribution  
153 functions. The distributions were fit with logistic Naka-Rushton functions of the form (Donlea  
154 et al., 2014):

$$155 \quad F = F_{max} \frac{I^n}{I^n + EC_{50}^n}$$

156 where  $F$  is the percentage of cells reaching threshold at a given current level  $I$ ,  $F_{max}$  is the  
157 percentage of cells reaching threshold at maximal current,  $EC_{50}$  indicates the half-maximal or  
158 semisaturation current, and the exponent  $n$  determines the steepness of the curve. With only  
159 two free parameters ( $EC_{50}$  and  $n$ , given that  $F_{max}$  is measured experimentally), this simple  
160 model provided a satisfying fit to all distributions.

161

### 162 **Analysis of circadian behavior**

163 Three-day old female flies were individually inserted into 65 mm glass tubes and loaded into  
164 the Trikinetics Drosophila Activity Monitor system, which was operated at 31°C in 24-hour  
165 dark (DD) conditions for 5–7 days. Group sizes for activity measurements (16 experimental  
166 and 16 control flies) reflect the capacity of the monitors.

167

### 168 **Third antennal segment dissection**

169 Groups of 20–30 flies were aged in precisely controlled temperature conditions for 5 days  
170 (see Fig. 4A) and decapitated with a surgical scalpel on a CO<sub>2</sub> pad; the heads were transferred  
171 to petri dishes kept on dry ice. Once a petri dish contained ~50 heads, it was sealed with  
172 parafilm and stored at -80°C until RNA extraction. The sealed petri dishes were dipped in  
173 liquid nitrogen for 60 seconds, vortexed at full strength for 60 seconds, and then unsealed and  
174 placed on a dry-ice-chilled glass stand under a dissection microscope. Individual third  
175 antennal segments were picked with fine forceps and placed directly into 100 µl TRIzol  
176 (Thermo Fisher Scientific).



177

## 178 **RNA extraction**

179 Third antennal segments in 100  $\mu$ l TRIzol were disrupted with several strokes in a Dounce  
180 homogenizer. The homogenates were diluted with 900  $\mu$ l TRIzol and incubated at room  
181 temperature for 5 minutes. Samples destined for 3' digital gene expression profiling (3' DGE)  
182 underwent phase separation after the addition of 225  $\mu$ l chloroform; RNA in the aqueous  
183 phase was precipitated with isopropanol and resuspended in 5  $\mu$ l RNase-free water. Total  
184 RNA for RNA-seq and RT-qPCR was isolated with the help of RNeasy minelute columns  
185 (Qiagen), following the addition of 400  $\mu$ l of 70% RNase-free ethanol to the TRIzol  
186 homogenates and on-column DNaseI digests. Samples were snap frozen in liquid nitrogen and  
187 stored at  $-80^{\circ}\text{C}$ .

188

## 189 **cDNA library generation**

190 Libraries for 3' DGE were generated at MWG Eurofins Genomics from ultrasonically  
191 fragmented poly(A)-tailed RNA, which was isolated using oligo(dT) chromatography.  
192 Following ligation of an RNA adapter to the 5'-end, the mRNA fragments were reverse-  
193 transcribed from an oligo(dT) primer, and the resulting cDNA was PCR-amplified with a  
194 high-fidelity polymerase. Each cDNA library was purified, size selected, quality-checked by  
195 capillary electrophoresis, and sequenced on the HiSeq2000 platform (Illumina) in 1x100 bp  
196 run mode.

197

198 For RNA-seq and RT-qPCR, oligo(dT)-enriched RNA underwent 14 cycles of amplification  
199 using the SMARTer Ultra Low RNA Kit for Illumina Sequencing (Clontech). After cDNA  
200 fragmentation, libraries were prepared in an additional 15 amplification cycles using the

201 NEBNext Ultra DNA Library Prep Kit for Illumina (New England Biolabs) and sequenced on  
202 the HiSeq2000 platform (Illumina) in paired-end mode.

203

#### 204 **Transcriptome analysis**

205 Raw reads were 100 base pairs (bp) in length (paired-end reads for RNA-seq and single-ended  
206 reads for 3' DGE). Fastq files, containing reads and quality scores, were first run through the  
207 FastQC package (Andrews, 2010). Highly abundant sequences that did not map to the  
208 *Drosophila* genome (and originated from primers or amplification artefacts) were eliminated  
209 using Trimmomatic software (Bolger et al., 2014). Reads were scanned with a 4-bp sliding  
210 window and cut when the average quality dropped below 15; trimmed reads shorter than 25  
211 bp were discarded. The reads were mapped to Ensembl DM genome release 5.74 using  
212 TopHat2 (Kim et al., 2013), assigned to transcripts annotated in the transcript file of the  
213 Berkeley Drosophila Genome Project (BDGP) release 5.74 with Cufflinks, and merged into  
214 an experiment-wide gtf file with Cuffmerge (Trapnell et al., 2012). The gtf file was used to  
215 produce raw read counts (using HTSeq) suitable for differential expression analysis in  
216 DESeq2 (Love et al., 2014). The topGO and *ViSEAGO* packages were used to analyze the  
217 enrichment of gene ontology (GO) terms in the set of differentially expressed genes called by  
218 DESeq2 (unadjusted  $p < 0.05$ ) vis-à-vis a reference set of all genes with a normalized  
219 expression level above 1 (the "gene universe") (Alexa et al., 2006; Brionne et al., 2019). To  
220 keep the number of Fisher's exact tests to a minimum, only GO terms with more than 40  
221 attached genes were considered. Enriched GO terms with unadjusted  $p < 0.01$  were clustered  
222 hierarchically according to Wang's distance, a measure of semantic similarity (Wang et al.,  
223 2007; Brionne et al., 2019).

224

#### 225 **Real time quantitative PCR (RT-qPCR)**

226 Transcript levels were determined by quantitative real-time PCR on a LightCycler 480 system  
227 (Roche) using SYBR Green I Master Mix (Roche) in 10- $\mu$ l reactions containing 100 nM of  
228 each gene-specific primer and 50 ng of pre-amplified cDNA. Two sets of primers were  
229 designed for each gene of interest. All samples were run in technical triplicates; non-reverse-  
230 transcribed mRNA and water served as negative controls. Melting curves were analyzed after  
231 amplification, and amplicons were visualized by agarose gel electrophoresis to confirm  
232 primer specificity. Relative transcript levels were estimated with the help of the  $2^{-\Delta\Delta C_t}$  method  
233 (Livak and Schmittgen, 2001), using the housekeeping gene *CycK* for normalization.

## 234 **Results**

235

### 236 **Antennal transcriptomics**

237 To characterize gene expression in the third antennal segment, 5-day old male Canton-S (CS)  
238 flies were decapitated either between zeitgeber time (ZT) 5 and ZT8 (the day group) or  
239 between ZT17 and ZT20 (the night group). After snap-freezing, third antennal segments were  
240 manually isolated, and total RNA was extracted in a single batch to minimize variability (Fig.  
241 1A, see Methods). For both day and night conditions, three biological replicates were  
242 prepared, and the resulting six cDNA libraries were sequenced on one lane of an Illumina  
243 HiSeq2000 machine using 3' digital gene expression profiling (3' DGE) technology. After  
244 stringent quality assessment and read trimming (Fig. 1A), the high-quality reads were mapped  
245 to the *Drosophila* genome (for mapping statistics, see Table 1). Biological replicates showed  
246 high correlations with one another (Fig. 1B, Table 1), and day and night samples could easily  
247 be distinguished on the basis of their top two principal components (Fig. 1B, inset).

248 Underlying this clean separability were 128 differentially expressed genes, identified by  
249 DESeq2 (Love et al., 2014) with a false discovery rate (FDR)-adjusted significance level of <  
250 0.2, and large expression level differences between the day and night (Fig. 1C, Table 2). Core  
251 clock components, such as *cryptochrome*, *Clock*, *period*, *timeless*, and *vriille*, were found near  
252 the top of the amplitude distribution of oscillating transcripts (Fig. 1C), in two groups at  
253 opposite poles of the 24-hour cycle, consistent with their antagonistic roles in the  
254 transcriptional feedback oscillator (Claridge-Chang et al., 2001; McDonald and Rosbash,  
255 2001).

256

257 Transcripts encoding olfactory, gustatory, and ionotropic receptors (ORs, GRs, and IRs)  
258 provided an index of the purity of our library preparations. Certain ORs, IRs, and GRs are

259 expressed in antennal ORNs but not elsewhere, while others are absent from antennal ORNs  
260 but present in different types of sensory neuron (Clyne et al., 1999; Gao and Chess, 1999;  
261 Vosshall et al., 1999; Scott et al., 2001; Benton et al., 2009). We detected the former, but not  
262 the latter, members of all three receptor families in abundance (Fig. 2A–C).

263

#### 264 **Transcriptomics-friendly manipulation of postsynaptic excitability**

265 Kir2.1 is an inwardly rectifying potassium channel that decreases the input resistance of  
266 neurons and clamps their membrane potential at or below its resting value; it is widely used as  
267 a neuronal "silencer" (Johns et al., 1999). Some single amino acid substitutions in the P-loop  
268 signature sequence of the channel (Heginbotham et al., 1994), such as G146S (here called  
269 Kir2.1-nc), block ion flow without affecting the protein's localization (Haruna et al., 2007).  
270 We generated *Drosophila* codon-optimized *UAS-EGFP::Kir2.1* and *UAS-EGFP::Kir2.1-nc*  
271 lines and crossed them to the *GHI46-GAL4* driver, which directs transgene expression to PNs  
272 (Stocker et al., 1997). Whereas the non-conducting Kir2.1-nc variant proved innocuous, the  
273 expression of functional Kir2.1 under *GHI46-GAL4* control caused early larval lethality, but  
274 this premature death could be circumvented with three tubulin promoter-driven copies of the  
275 temperature-sensitive repressor of GAL4, GAL80<sup>ts</sup> (McGuire et al., 2003), which kept the  
276 expression of the channel at bay until the block was thermally relieved during adulthood.

277

278 Following their induction for 24 h at 31°C, both EGFP-tagged channels (Kir2.1 and Kir2.1-  
279 nc) were detected in PNs of 5 day-old adults at comparable levels and in the same anatomical  
280 distribution (Fig. 3A). Whole-cell current-clamp recordings showed that EGFP::Kir2.1 lowers  
281 the input resistance and membrane time constant relative to EGFP::Kir2.1-nc (Fig. 3B–D) and  
282 powerfully opposes depolarization: Kir2.1-expressing neurons required approximately two-  
283 fold larger depolarizing currents to drive spiking across a firing rate range of 1–50 Hz (Fig.

284 3E). Although Kir2.1 does not strictly silence the population of neurons in which it is  
285 expressed (the added potassium conductance can always be compensated by a large enough  
286 current injection; Figs. 3B,E), the currents necessary to do so seem difficult to attain *in vivo*.

287

288 A simple behavioral test supported this conclusion. Adult-onset expression of Kir2.1 in the  
289 PDF-expressing ventral subset of lateral pacemaker neurons (using the *pdf-GAL4* driver)  
290 disrupted the circadian locomotor rhythm in constant darkness, as expected (Nitabach et al.,  
291 2002), whereas flies expressing Kir2.1-nc remained rhythmic (Fig. 3F).

292

### 293 **Trans-synaptic regulation of gene expression: transmitter release and synapse** 294 **remodeling, and a late shift to proteostasis and neuroprotection**

295 To delineate changes in presynaptic gene expression after muting postsynaptic neural activity,  
296 we compared the third antennal segment transcriptomes of flies expressing either Kir2.1 or  
297 Kir2.1-nc in PNs (Fig. 4A). We studied three induction times—12 hours, 48 hours, and 96  
298 hours—in individuals that were age-matched at the point of analysis: all tissues were  
299 harvested between ZT6 and ZT7 on the fifth post-eclosion day (Fig. 4A). Two sequencing  
300 technologies—3' DGE for the 12- and 48-hour groups and standard RNA-seq for the 96-hour  
301 group—gave similar mapping metrics (Tables 3 and 4).

302

303 For 12-hour induction, experimental (Kir2.1) and control (Kir2.1-nc) flies were placed at  
304 31°C from ZT18 until ZT6 on their fifth post-eclosion day and decapitated between ZT6 and  
305 ZT7 on the same day (Fig. 4A). Three biological replicates were sequenced for each genotype,  
306 one from males and two from females, and sex differences were accounted for and removed  
307 by the regression model entered into DESeq2. This analysis highlighted 25 differentially  
308 expressed antennal segment genes with FDR-adjusted  $p < 0.20$  (Table 5). The average

309 changes in absolute expression levels of the top 20 differentially expressed genes were about  
310 15-fold smaller than those of the top 20 clock-controlled genes ( $\log_2$  fold changes:  $0.35 \pm 0.08$   
311 for homeostatic genes vs.  $1.9 \pm 0.9$  for circadian genes; Tables 2 and 5), resulting in many  
312 fewer significant hits for the same FDR threshold. Among genes with the smallest FDR-  
313 adjusted  $p$ -values, many are involved in cell fate commitment and morphogenesis (Table 5);  
314 eight (*bazooka*, *sugar-free frosting*, *plum*, *prospero*, *Ankyrin 2*, *spätzle*, *Syncrip*, and  
315 *ATP6AP2*) have been linked to synaptic organization or synapse formation, however  
316 indirectly (Doe et al., 1991; Ruiz-Canada et al., 2004; Koch et al., 2008; Pielage et al., 2008;  
317 Baas et al., 2011; Sutcliffe et al., 2013; Yu et al., 2013; Halstead et al., 2014; Dubos et al.,  
318 2015).

319

320 For 48-hour induction, experimental and control groups were shifted to 31°C at ZT6 of their  
321 third post-eclosion day and decapitated between ZT6 and ZT7 on day 5 (Fig. 4A). Three  
322 biological replicates—all from males—were sequenced for each genotype using 3' DGE  
323 technology. One of the Kir2.1-nc replicates did not cluster well with the others (Table 3) and  
324 was excluded from the differential expression analysis, which produced 26 hits with FDR-  
325 adjusted  $p < 0.20$  (Table 6). Conspicuous among these hits were several ribosomal  
326 components and three chaperones of the Hsp20 family (Hsp27, Hsp67Bc, and Hsp23)  
327 (Haslbeck et al., 2019). At first glance, the upregulation of heat shock proteins might suggest  
328 a direct effect of our method of transgene induction (31°C heat), but upon reflection heat  
329 cannot explain the observed differences because experimental and control flies were exposed  
330 to the same temperature regime. A more plausible explanation is, therefore, that prolonged  
331 postsynaptic silencing places an intense homeostatic burden on presynaptic partners which  
332 elicits a generalized increase in protein synthesis.

333

334 For 96-hour induction, experimental and control groups were kept at 31°C from ZT6 of their  
335 first post-eclosion day and again decapitated between ZT6 and ZT7 on day 5 (Fig. 4A). A  
336 total of 20 libraries were sequenced in two batches using RNA-seq technology. A different  
337 sequencing method was chosen to ensure that our results were valid across sequencing  
338 platforms, and more replicates were processed to increase sensitivity. The first batch consisted  
339 of 12 samples with six replicates from each of the two genotypes (all male third antennal  
340 segments). Two replicates of each genotype in the first batch (K96-2, K96-3, C96-2, and C96-  
341 3) were sequenced to twice the depth of the others to detect very lowly expressed genes more  
342 reliably. The second batch (eight samples in total) consisted of another four samples of each  
343 genotype, two each from females and two from males. Two samples (K96-1 and K96-9) had  
344 low within-batch correlations and were omitted from the analysis (Table 4). The increase in  
345 statistical power enabled the detection of 32 differentially expressed genes with FDR-adjusted  
346  $p < 0.05$  after controlling for sex and batch in DESeq2 (Table 7). Three biological processes  
347 stand out among these differentially expressed genes. First, six genes related to the Imd and  
348 Toll pathways of the innate immune response (Valanne et al., 2011) were strongly  
349 downregulated: the pattern recognition receptor PGRP-SD; the antibacterial peptide Drosocin  
350 (Dro); the negative regulator of Imd, *pirk*; and the antimicrobial peptides Bomanin Short 1, 3,  
351 and 5 (a.k.a. IM1, IM2, and IM3). Second, chaperones of the Hsp20 family, already  
352 encountered after 48-h induction, were again upregulated (Hsp26, Hsp23, and Hsp67Bc)  
353 (Haslbeck et al., 2019). And third, four genes involved in programmed cell death were  
354 differentially expressed, with two pro-apoptotic factors downregulated—matrix  
355 metalloproteinase 1 (Mmp 1) and apoptosis-inducing factor (AIF)—and two gene products  
356 inhibiting apoptosis up-regulated (Hsp26, Buffy) (Quinn et al., 2003; Wang et al., 2004; Joza  
357 et al., 2008). Overall, the 96-hour picture suggests a transcriptional landscape tilted toward  
358 cell protection and maintenance.



359

360 To obtain an aerial overview of transcriptionally regulated biological processes during all  
361 induction periods, we probed for coordinated changes in functionally related sets of genes via  
362 gene ontology (GO) enrichment analyses. These analyses were performed on all differentially  
363 expressed genes with unadjusted  $p < 0.05$  and included only GO terms with more than 40  
364 attached genes; the enriched GO terms (Fisher's exact test,  $p < 0.01$ ) were then hierarchically  
365 clustered according to their semantic similarity (Wang et al., 2007; Brionne et al., 2019) (Fig.  
366 4B). After 12 hours of induction, presynaptic transcriptional changes centered on genes  
367 encoding synaptic release and remodeling machinery; at 48 hours and beyond, protein  
368 synthesis and degradation, and energy metabolism, predominated (Fig. 4B,C, Tables 8–10).  
369 Closer scrutiny of the 81 genes responsible for the early enrichment of synaptic GO  
370 annotations (Fig. 4C, Tables 11 and 12) uncovered many with established roles in homeostatic  
371 plasticity at the NMJ (or with known interactions with such genes), as we discuss below.  
372 Although typical transcripts showed only modest expression level changes of 15–30%, their  
373 regulation was clearly visible across multiple libraries (Fig. 4D). This consistency across  
374 biological replicates, and the statistically verified overabundance of synaptic genes in the  
375 differentially expressed set with low unadjusted  $p$ -values (Tables 11 and 12), suggest a  
376 genuine signal.

377

### 378 **Cross-validation of regulated genes with 3' DGE, RNA-seq, and RT-qPCR**

379 As a further validation of our gene expression measurements, we compared transcriptome-  
380 wide 3' DGE with transcriptome-wide RNA-seq data. There was an approximately linear  
381 relationship between the average expression levels of all genes in all samples (Fig. 5A), with a  
382 small departure in lowly expressed genes caused by the extra amplification step in the RNA-  
383 seq protocol (see Methods); as a result RNA-seq reported systematically higher expression

384 levels for scarce transcripts than did 3' DGE. For genes transcribed at moderate to high  
385 expression levels, the two sequencing platforms were in close agreement.

386

387 We next selected 11 transcripts for RT-qPCR verification. These transcripts were chosen from  
388 the set of differentially expressed genes (unadjusted  $p < 0.05$ ; both up- and down-regulated)  
389 in the 96-hour induction group and used to validate all deep sequencing data. The fold  
390 changes of the 11 chosen transcripts, as estimated by RT-qPCR with normalization to the  
391 housekeeping gene *CycK*, correlated tightly with 3' DGE and RNA-seq measurements (Fig.  
392 5B). This agreement between three independent measures of gene expression, at a  
393 transcriptome-wide scale and across several individual genes, lends confidence to our  
394 analysis.

395 **Discussion**

396

397 **Trans-synaptic regulation of gene expression**

398 Our study introduces an experimental system for detecting changes in gene expression in  
399 response to changes in the electrical excitability of a partner cell. The product of the *Kir2.1*  
400 transgene powerfully suppresses the activity of neurons in which it is expressed, while a  
401 control transgene, which codes for a potassium channel with a single amino acid substitution  
402 in its selectivity filter (*Kir2.1-nc*), has no effect (Fig. 3B–F). Isogenic strains expressing one  
403 or the other of these transgenes from the same chromosomal locus offer an ideal platform for  
404 differential gene expression analyses because differences between them can be pinned to a  
405 single codon change in the genome. The finding that prolonged postsynaptic silencing induces  
406 the expression of Hsp20 proteins in a manner unrelated to heat shock (Tables 6 and 7)  
407 underscores the power of this carefully controlled system.

408

409 The same finding, however, also highlights a limitation particular to our current approach. We  
410 imposed the *Kir2.1* clamp on the first synaptic relay in the *Drosophila* olfactory system  
411 because its pre- and postsynaptic elements are easily separable by purely physical means, but  
412 this convenience exacted a price: the third antennal segment contains not only ORNs but also  
413 glial and support cells, which account for about two thirds of the segment's cell population  
414 (Vosshall et al., 1999). We are therefore unable to determine whether the expression of Hsp20  
415 proteins is exclusively or even partially neuronal. Although the same reservation does not  
416 apply to the many synaptic genes that are differentially expressed during the early phase of  
417 the homeostatic response (Fig. 4B,C), the presence of non-neuronal contaminants may  
418 nevertheless have hindered the detection of low-abundance neuronal transcripts or  
419 underestimated their fold change. Both of these drawbacks could be overcome by FACS-

420 isolation of a genetically labeled cell population before RNA extraction, as would be required  
421 as a matter of course in all instances where the synaptic partners are anatomically  
422 intermingled. With this extra step, our system will be easily adapted for analyses of  
423 transcriptional changes elicited in presynaptic cells by a loss of postsynaptic responsivity, in  
424 postsynaptic cells by a loss of presynaptic input, or in glial cells by a heightened demand for  
425 synaptic remodeling.

426

427 Despite these caveats, many of the early expression level changes we detect affect genes  
428 encoding synaptic proteins with known, suspected, or at least plausible roles in homeostatic  
429 plasticity (Fig. 4B,C, Tables 5, 11, and 12) (Davis and Müller, 2015): elements of the  
430 wingless signaling system (e.g., Wnk, sgg), which acts as an endogenous suppressor of  
431 homeostatic compensation at the NMJ (Marie et al., 2010); the v-SNARE synaptobrevin  
432 (nSyb) and its chaperone Nsf2 (Söllner et al., 1993; Bacci et al., 2001); rab3 guanine  
433 nucleotide exchange factor (rab3-GEF), which controls the assembly and distribution of  
434 active zone components (Bae et al., 2016) and regulates the nucleotide state-dependent  
435 association of rab3 with synaptic vesicles, which in turn determines the calcium sensitivity of  
436 their release (Geppert et al., 1997; Müller et al., 2011); an active zone resident (unc-13-4a)  
437 known to associate with the Rab3-interacting molecule RIM and other active zone  
438 components (Schoch et al., 2002; Liu et al., 2011; Müller et al., 2012); a kinesin motor heavy  
439 chain (Khc-73) implicated in active zone assembly and synaptic homeostasis (Tsurudome et  
440 al., 2010); an active zone-integral guanylate kinase (CASK) that serves as a phosphorylation  
441 target of CDK5 (Samuels et al., 2007), which homeostatically regulates presynaptic calcium  
442 influx and release probability (Seeburg et al., 2008; Kim and Ryan, 2010); the E3 ubiquitin-  
443 protein ligase highwire (hiw) and the Smad protein Medea (Med), which in motor neuron  
444 terminals are part of the transduction cascade for a retrograde signal from muscle (Haghighi et

445 al., 2003; McCabe et al., 2004; Goold and Davis, 2007); the cytoskeletal anchor Ankyrin 2  
446 (Koch et al., 2008; Pielage et al., 2008); and subunits or accessory proteins of voltage-gated  
447 ion channels (quiver, ether-á-go-go, Hyperkinetic, paralytic) (Tables 5, 11, and 12).  
448 Collectively, these changes could signal an increase in the number of release sites or an  
449 expansion of the release-ready vesicle pool, inferred to represent the dominant quantal  
450 parameter change during homeostatic matching at ORN-to-PN synapses (Kazama and Wilson,  
451 2008) and one of two homeostatic levers at the NMJ (the other being modulation of calcium  
452 influx into the terminal) (Müller et al., 2012).

453

454 When drawing comparisons with earlier work, however, it is important to bear in mind  
455 experimental differences in the speed of induction and expression of the homeostatic  
456 response. Abrupt adult-onset PN silencing resembles an acute postsynaptic receptor blockade  
457 at the NMJ more closely than it does the slow developmental processes studied in analyses of  
458 arbor size matching in the antennal lobe (Kazama and Wilson, 2008; Mosca and Luo, 2014),  
459 but homeostatic compensation at the NMJ is evident within minutes, long before changes in  
460 gene expression can occur (Frank et al., 2006). That elements of the homeostatic machinery  
461 are encoded by trans-synaptically regulated genes must therefore reflect a secondary layer of  
462 feedback control or a more profound reallocation of ORN synapses between PNs and other  
463 postsynaptic partners, such as local neurons of the antennal lobe (Groschner and Miesenböck,  
464 2019).

465

466 Because changes in the expression levels of putative homeostatic genes are small compared to  
467 those of circadian-regulated genes (Figs. 1D, 4C), we were forced to apply lenient FDR  
468 thresholds to the 12-hour and 48-hour induction experiments, raising the specter of false  
469 positives in these data sets. Two observations should allay this concern. First, the 96-hour

470 induction experiment, whose greater statistical power made the application of a more stringent  
471 significance threshold possible, recovered many of the same biological processes and indeed  
472 the same genes (e.g., Hsp23, Hsp67Bc) as the statistically weaker 48-hour induction  
473 experiment (Tables 9 and 10). Second, our RT-qPCR validation included several genes that  
474 failed to cross the most stringent FDR threshold (Fig. 5B). These RT-qPCR spot checks  
475 confirmed that expression level changes detected by RNA-seq or 3' DGE were accurate.  
476 Nonetheless, new candidates emerging from our screen will need to survive rigorous  
477 functional studies before joining the ranks of established homeostatic plasticity genes.

478

#### 479 **Labeling connections with trans-synaptically regulated genes?**

480 Transcriptional changes that are controlled by trans-synaptic signals could be exploited for the  
481 generation of new circuit-breaking tools. In most neurobiological studies, the object of  
482 interest is not a population of genetically homogeneous neurons but an operational unit—a  
483 circuit—defined by connectivity rather than a common genetic marker (Miesenböck and  
484 Kevrekidis, 2005). Circuit analyses have benefited greatly from the development of trans-  
485 synaptic vectors (Card et al., 1990; Kuypers and Ugolini, 1990; Strack and Loewy, 1990;  
486 Wickersham et al., 2007), which travel along synaptic connections between specific types of  
487 neuron and serve as vehicles for the distribution of other encodable tools (Sjulson et al.,  
488 2016).

489

490 Ideally, trans-synaptic expression systems possess a mechanism that allows their initialization  
491 at a specific location, a rule that governs their propagation in the network, and gain. Viruses  
492 have some of these characteristics (Card et al., 1990; Kuypers and Ugolini, 1990; Strack and  
493 Loewy, 1990; Wickersham et al., 2007). Their infectious spread can follow routes of synaptic  
494 transmission, and replicative gain (where permitted) allows each infected neuron to supply

495 more viral particles to its outputs than it receives from its inputs. Viral infections are,  
496 however, difficult to control and initialize with single-cell resolution and can produce  
497 considerable toxicity and extrasynaptic spread.

498

499 Lectins and catalytically crippled neurotoxins are also ferried across synapses (Schwab et al.,  
500 1979; Gerfen et al., 1982; Ruda and Coulter, 1982). These stripped-down trans-synaptic  
501 tracers lack the cytotoxic effects of viral replication but also the associated gain and the  
502 capacity to serve as gene delivery vehicles. The need to carry the label as payload across the  
503 synaptic cleft requires high expression levels, which jeopardize the specificity of transfer.  
504 Clearly, the ideal trans-synaptic vector would, instead of carrying its own genetic material or  
505 marker, act on expression cassettes that lie dormant in the genome of the host organism until  
506 switched on by a trans-synaptic signal.

507

508 Circuit-tracing systems such as *trans*-Tango, TRACT, and BAcTrace are built on this  
509 principle but require the reconstitution of an exogenous, contact- or ligand-based, cell-to-cell  
510 signaling apparatus (Huang et al., 2017; Talay et al., 2017; Cachero et al., 2020). This  
511 introduces additional genetic complexity and the danger of overexpression artefacts if the  
512 foreign molecules escape synaptic confinement. Eavesdropping on endogenous trans-synaptic  
513 communication during homeostatic plasticity offers a possible cure for these problems.  
514 Imagine a sudden, targeted loss of excitability in a small group of neurons or even a single  
515 cell, brought about by the inducible expression of Kir2.1. If presynaptic partners sense this  
516 perturbation and compensate homeostatically, the upregulation of plasticity genes could be  
517 coupled to the expression of sensors, actuators, transcription factors, or recombinases (Sjulson  
518 et al., 2016).

519

520 The chief obstacle to the development of this retrograde tracing technology is the small, at  
521 most two-fold, changes in homeostatic gene expression we detect (Tables 5, 11, and 12). We  
522 suspect that these changes would need to be amplified with adequate signal-to-noise ratio,  
523 perhaps by flipping a permanent recombination switch (Sjulson et al., 2016), to be practically  
524 useful. Region- or cell-specific differences in the capacity or mechanisms of homeostatic  
525 compensation are another potential concern. For example, it is likely that different plasticity  
526 mechanisms operate at excitatory and inhibitory synapses (or that the same genes respond to  
527 activity perturbations in opposite directions) (Turrigiano, 2011), leaving our hypothetical  
528 tracing tool blind to—or, depending on perspective, selective for—one or the other class of  
529 input. Still, the substantial overlap between components of the homeostatic machinery at the  
530 NMJ (Davis and Müller, 2015) and homeostatically regulated genes in the antennal lobe (Fig.  
531 4C) suggests at least a measure of functional conservation from peripheral to central synapses.  
532 And, the activity-dependent changes in the expression levels of immediate early genes, which  
533 are widely used to capture task-specific neural ensembles (Morgan and Curran, 1991; Sjulson  
534 et al., 2016; DeNardo and Luo, 2017), are roughly equal to those of the trans-synaptically  
535 regulated genes we have identified.

536

### 537 **Author contributions**

538 E.R.H. and G.M. designed the study, analyzed and interpreted the results, and wrote the  
539 paper. E.R.H. performed all experiments with the exception of electrophysiological  
540 recordings, which were done by D.P.



541 **Figures and Figure Legends**

542

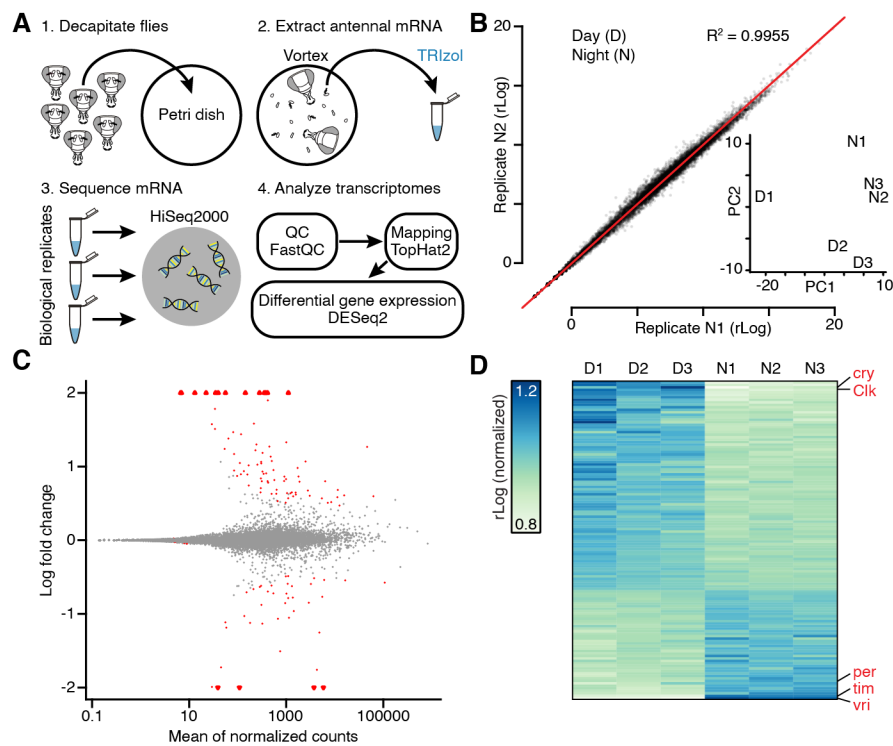

543

544

545 **Figure 1.** Antennal transcriptomics: workflow, diagnostics, and functional validation. **A**,

546 Experimental workflow. **B**, Scatterplot of gene expression levels in biological replicates N1

547 vs. N2. Inset: D and N samples in a principal component analysis (PCA) plot. **C**, MA plot of

548  $\log_2$  fold change in expression vs. mean expression level of all transcripts. Triangles represent

549 data points outside the plotted range. **D**, Expression levels of all transcripts with FDR-

550 adjusted  $p < 0.20$  during the day and night. Each column represents a sequencing library

551 generated from third antennal segments. Core clock components are indicated in red.

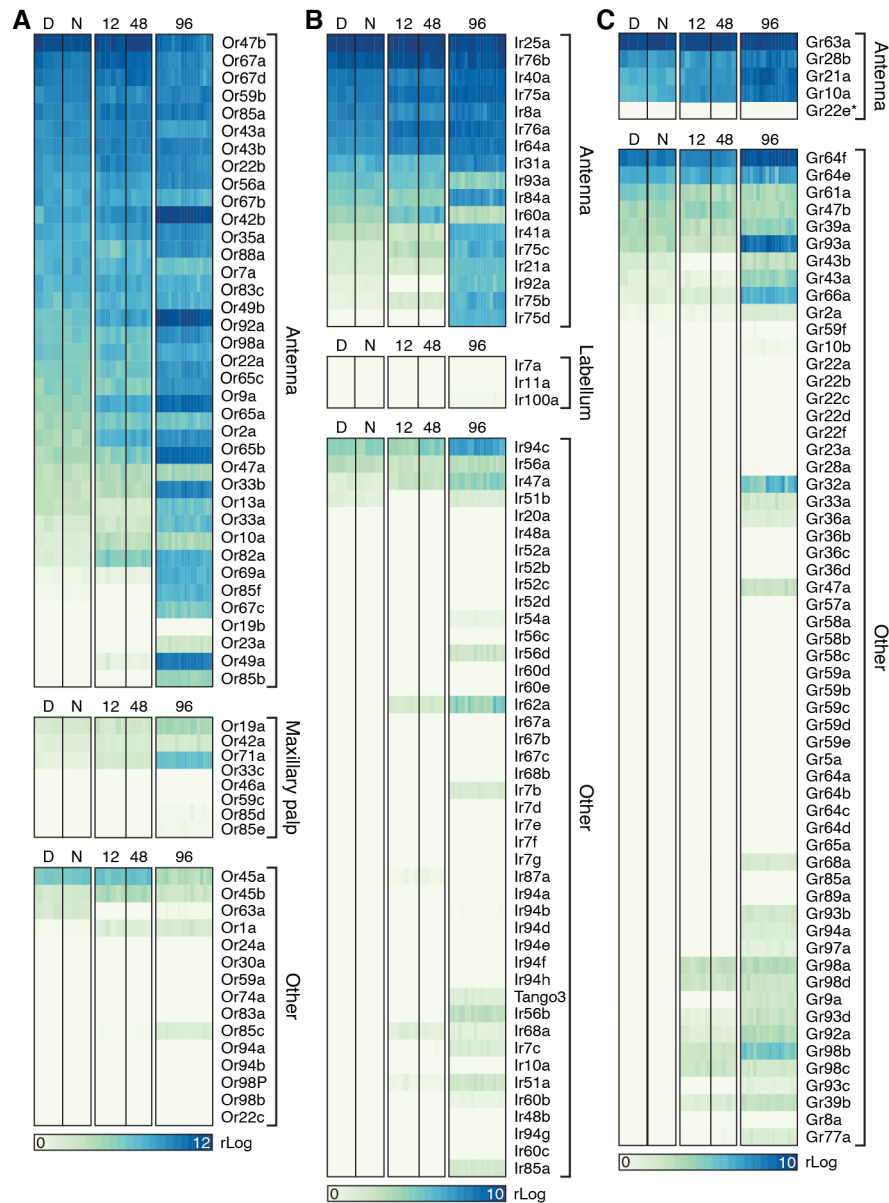

552

553

554 **Figure 2.** Expression levels of ORs (A), IRs (B), and GRs (C) in sequencing libraries

555 generated from third antennal segments. Each column represents a library generated during

556 the day (D) or night (N), or after 12-hour, 48-hour, or 96-hour induction of Kir2.1 or Kir2.1-

557 nc. The gene encoding the obligatory OR coreceptor Orco/Or83b was expressed at a level

558 above those of other OR genes (mean rLog  $\pm$  SEM = 13.6178  $\pm$  0.16503) and omitted from A.

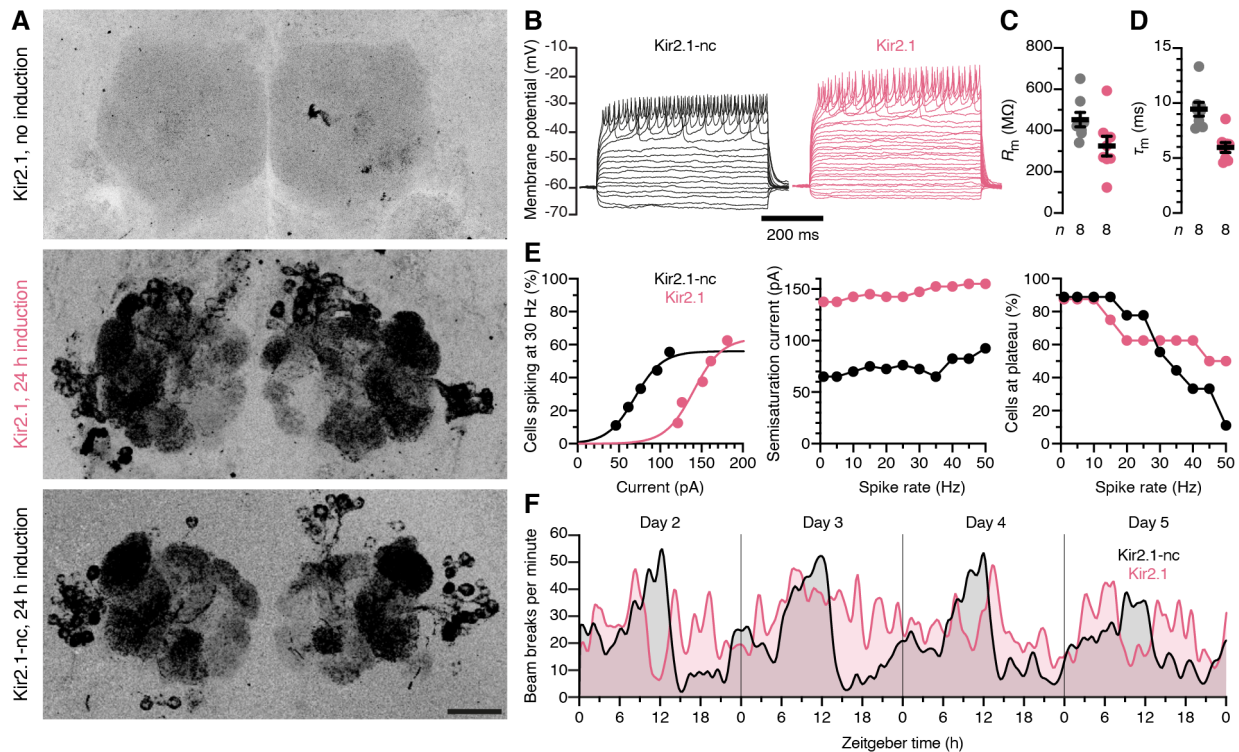

559

560

561 **Figure 3.** A transcriptomics-friendly neuronal activity clamp. **A**, Maximum intensity  
 562 projections of confocal image stacks through the antennal lobes of 5-day old female flies  
 563 carrying *EGFP::Kir2.1* or *EGFP::Kir2.1-nc* transgenes under *GHI46-GAL4* and *tub-GAL80<sup>ts</sup>*  
 564 control. The expression of Kir2.1 constructs is undetectable at 21°C (top) but induced at 31°C  
 565 (center and bottom). Scale bar, 20 μm. **B**, Example voltage responses to 5-pA current steps of  
 566 antennal lobe PN's expressing *EGFP::Kir2.1-nc* (black) or *EGFP::Kir2.1* (red). **C**, **D**, Kir2.1  
 567 (red) lowers the input resistance  $R_m$  ( $p = 0.0481$ ,  $t$ -test; **C**) and shortens the membrane time  
 568 constant  $\tau_m$  ( $p = 0.0005$ ,  $t$ -test; **D**) relative to Kir2.1-nc (black). Circles, individual PN's; bars,  
 569 means  $\pm$  SEM. **E**, Cumulative distribution functions of the percentages of PN's reaching a  
 570 spike frequency of 30 Hz at different levels of injected current (left); semisaturation currents  
 571 (center) and percentages of cells reaching spike rates of 1–50 Hz, for PN's expressing Kir2.1-  
 572 nc (black) or Kir2.1 (red). **F**, Circadian locomotor rhythms in constant darkness. Locomotion  
 573 was quantified as the total number of midline crossings per minute in groups of 16 flies  
 574 expressing Kir2.1-nc (black) or Kir2.1 (red) under *pdf-GAL4* control. The traces were

575 smoothed with a Gaussian kernel (1.25 hours FWHM) and show data collected on days 2–5  
576 after the flies were transferred to activity monitors.

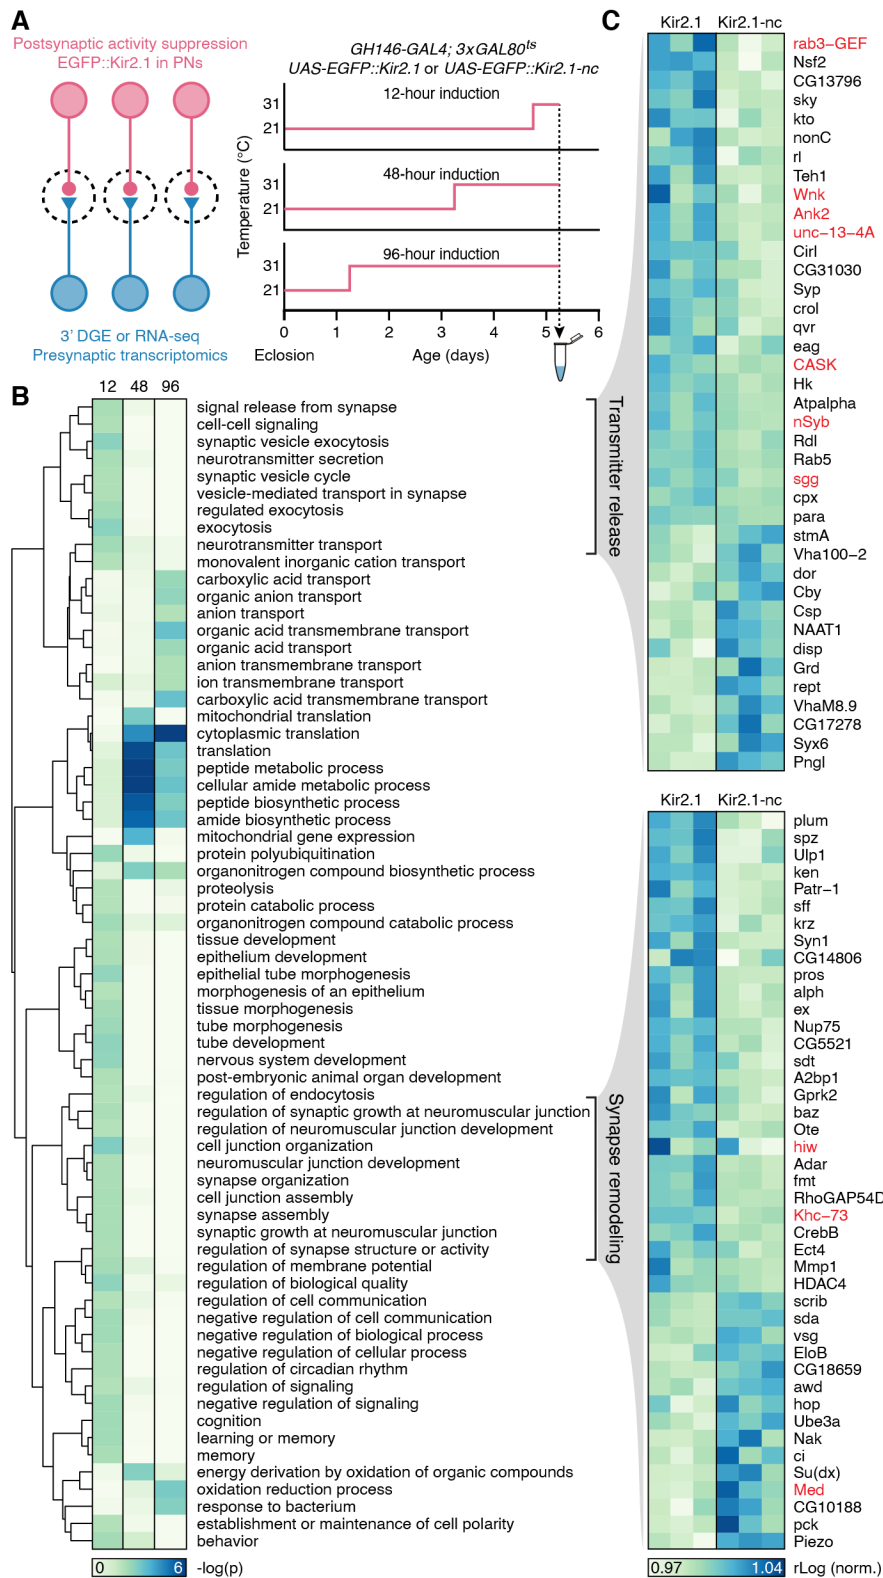

577

578

579 **Figure 4.** Trans-synaptic regulation of gene expression: transmitter release and synapse

580 remodeling, and a late shift to proteostasis and neuroprotection. **A**, Experimental design. **B**,

581 Enrichment of GO biological process terms in third antennal segment transcriptomes after 12-  
582 hour, 48-hour, and 96-hour induction of Kir2.1. The dendrogram represents semantic  
583 groupings among GO terms. **C**, Expression levels of transcripts attached to two semantic  
584 groupings, "transmitter release" and "synapse remodeling" (**B**), after 12 hours of induction of  
585 Kir2.1 or Kir2.1-nc. Each column represents a sequencing library. Gene products previously  
586 implicated in homeostatic synaptic plasticity (see Discussion) are indicated in red.

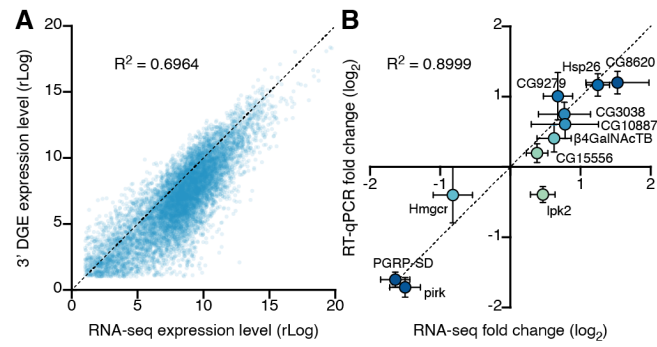

587

588

589 **Figure 5.** Cross-validation of differential gene expression. **A**, Scatterplot of average gene  
590 expression levels determined by RNA-seq vs. 3' DGE. **B**, Scatterplot of  $\log_2$  fold changes  
591 (means  $\pm$  SEM) in the expression levels of 11 transcripts after 96-hour induction of Kir2.1,  
592 determined by RNA-seq or RT-qPCR.

593 **Tables**

594 **Table 1. Mapping metrics of third antennal segment transcriptomes collected during the**  
595 **day (D) and night (N)**

596

| ID      | <i>n</i> Reads | <i>n</i> Mapped | % Mapped | <i>n</i> Unique | % Unique | Average R <sup>2</sup> |
|---------|----------------|-----------------|----------|-----------------|----------|------------------------|
| D1      | 20,857,542     | 14,732,179      | 70.63%   | 13,342,850      | 63.97%   | 0.9897                 |
| D2      | 19,466,527     | 14,408,098      | 74.01%   | 13,373,355      | 68.70%   | 0.9931                 |
| D3      | 18,908,595     | 14,656,324      | 77.51%   | 13,440,037      | 71.08%   | 0.9919                 |
| N1      | 22,905,480     | 18,406,329      | 80.36%   | 17,187,773      | 75.04%   | 0.9955                 |
| N2      | 21,095,058     | 16,864,414      | 79.94%   | 15,564,220      | 73.78%   | 0.9963                 |
| N3      | 23,547,296     | 18,429,070      | 78.26%   | 16,918,247      | 71.85%   | 0.9963                 |
| Average | 21,130,083     | 16,249,402      | 76.79%   | 14,971,080      | 70.74%   | 0.9938                 |

597

598 Absolute number and percentages of reads aligned to the transcript file of the Berkeley  
599 *Drosophila* Genome Project (BDGP) release 5.74. *n* Reads: number of raw reads; *n* Mapped  
600 and % Mapped: number of reads mapping to the reference transcriptome with corresponding  
601 percentage; *n* Unique and % Unique: number of reads mapping to a unique location in the  
602 reference transcriptome with corresponding percentage; Average R<sup>2</sup>: average replicate  
603 correlation (Pearson's correlation coefficient calculated across all genes with a non-zero read  
604 count in at least one replicate).



605 **Table 2. Circadian-regulated genes (FDR-adjusted  $p < 0.01$ )**

| Gene            | Baseline expression | Log <sub>2</sub> fold change | $p$       | FDR       | Description                             |
|-----------------|---------------------|------------------------------|-----------|-----------|-----------------------------------------|
| <i>vri</i>      | 3724.50             | -4.6985                      | 4.29E-106 | 3.89E-102 | core circadian clock                    |
| <i>tim</i>      | 5834.10             | -3.7979                      | 4.29E-78  | 1.95E-74  | core circadian clock                    |
| <i>GstD3</i>    | 1104.77             | 2.5973                       | 3.46E-28  | 1.05E-24  | glutathione metabolism                  |
| <i>CG2016</i>   | 281.15              | 2.9593                       | 1.22E-22  | 2.77E-19  | hormone binding                         |
| <i>CG33757</i>  | 410.74              | 2.9298                       | 1.03E-19  | 1.87E-16  | no functional information               |
| <i>Cyp4d21</i>  | 4279.26             | -1.8094                      | 7.21E-18  | 1.09E-14  | oxidation-reduction process             |
| <i>Clk</i>      | 143.92              | 2.9383                       | 2.18E-16  | 2.82E-13  | core circadian clock                    |
| <i>CG10026</i>  | 352.82              | 2.3039                       | 3.80E-15  | 4.31E-12  | lipid binding                           |
| <i>Ugt35b</i>   | 46348.94            | 1.3358                       | 3.54E-11  | 3.56E-08  | UDP glycosyl transferase                |
| <i>GstE9</i>    | 1001.76             | 1.4003                       | 2.71E-10  | 2.46E-07  | glutathione metabolism                  |
| <i>CG31324</i>  | 749.19              | -1.6055                      | 4.71E-09  | 3.88E-06  | no functional information               |
| <i>Pdh</i>      | 55.97               | 2.9461                       | 7.75E-09  | 5.85E-06  | receptor dehydrogenase                  |
| <i>CG6834</i>   | 2496.64             | 1.1409                       | 1.30E-08  | 9.04E-06  | no functional information               |
| <i>CG7208</i>   | 108.72              | -2.2001                      | 1.99E-08  | 1.29E-05  | no functional information               |
| <i>mt:lrRNA</i> | 418.18              | 2.0580                       | 1.64E-07  | 9.93E-05  | mitochondrial translation               |
| <i>CG15096</i>  | 1139.97             | -1.1414                      | 2.08E-07  | 1.14E-04  | transmembrane anion transport           |
| <i>slik</i>     | 449.97              | 1.3790                       | 2.14E-07  | 1.14E-04  | cell proliferation                      |
| <i>CG9815</i>   | 39.03               | -3.1059                      | 2.43E-07  | 1.23E-04  | no functional information               |
| <i>cu</i>       | 674.29              | -1.1606                      | 3.45E-07  | 1.57E-04  | NADP metabolism                         |
| <i>zormin</i>   | 503.40              | 1.1680                       | 3.29E-07  | 1.57E-04  | cytoskeletal structure                  |
| <i>CG10513</i>  | 326.16              | 1.2906                       | 3.72E-07  | 1.61E-04  | no functional information               |
| <i>Ugt86De</i>  | 477.43              | 1.2370                       | 5.25E-07  | 2.17E-04  | UDP glycosyl transferase                |
| <i>CG6484</i>   | 322.18              | -1.2398                      | 7.35E-07  | 2.90E-04  | glucose import                          |
| <i>CheB93b</i>  | 215.37              | 1.7419                       | 1.21E-06  | 4.56E-04  | pheromone detection                     |
| <i>CG7149</i>   | 1784.54             | 0.9488                       | 1.49E-06  | 5.42E-04  | phosphotransferase                      |
| <i>CG31100</i>  | 1430.28             | -1.0624                      | 2.34E-06  | 8.16E-04  | glucose import                          |
| <i>CG10433</i>  | 1716.02             | 1.0842                       | 2.70E-06  | 9.06E-04  | female receptivity to mating            |
| <i>CG2930</i>   | 545.58              | 1.0604                       | 4.77E-06  | 1.55E-03  | transmembrane transport                 |
| <i>CG6356</i>   | 4808.16             | -1.4003                      | 5.51E-06  | 1.72E-03  | transmembrane transport                 |
| <i>CG33946</i>  | 117.51              | 1.6102                       | 5.89E-06  | 1.78E-03  | no functional information               |
| <i>wbl</i>      | 231.65              | 1.3672                       | 6.67E-06  | 1.95E-03  | protein folding in ER                   |
| <i>CG3625</i>   | 6333.94             | 0.8930                       | 7.49E-06  | 2.12E-03  | no functional information               |
| <i>CG31321</i>  | 34.98               | 2.6316                       | 8.08E-06  | 2.22E-03  | transmembrane transport                 |
| <i>CG13841</i>  | 243.03              | 1.4691                       | 1.28E-05  | 3.42E-03  | no functional information               |
| <i>CG7724</i>   | 912.70              | 0.9733                       | 1.44E-05  | 3.74E-03  | oxidation-reduction process             |
| <i>Ugt35a</i>   | 303.93              | 1.2040                       | 1.63E-05  | 4.10E-03  | UDP glycosyl transferase                |
| <i>CG1698</i>   | 22.34               | 3.7173                       | 1.72E-05  | 4.22E-03  | neurotransmitter transport              |
| <i>CG11951</i>  | 39.60               | 2.5616                       | 1.79E-05  | 4.26E-03  | proteolysis                             |
| <i>mt:ND2</i>   | 385.70              | 1.0282                       | 1.84E-05  | 4.29E-03  | mitochondrial electron transport        |
| <i>CG6910</i>   | 255.13              | 1.1671                       | 2.27E-05  | 5.16E-03  | oxidation-reduction process             |
| <i>cwo</i>      | 1095.79             | -0.8935                      | 2.82E-05  | 6.24E-03  | circadian regulation of gene expression |

606

607  $p$ , unadjusted  $p$ -value; FDR,  $p$ -value adjusted for multiple comparisons.

608 **Table 3. Mapping metrics for third antennal segment transcriptomes collected after 12**  
 609 **or 48 hours of induction of Kir2.1 (K) or a non-conducting control (C)**

| <b>ID</b>      | <b><i>n</i> Reads</b> | <b><i>n</i> Mapped</b> | <b>% Mapped</b> | <b><i>n</i> Unique</b> | <b>% Unique</b> | <b>Average R<sup>2</sup></b> |
|----------------|-----------------------|------------------------|-----------------|------------------------|-----------------|------------------------------|
| K12-1          | 29,660,291            | 15,855,218             | 53.46%          | 14,082,433             | 47.48%          | 0.9939                       |
| K12-2          | 28,904,100            | 15,808,260             | 54.69%          | 14,110,730             | 48.82%          | 0.9943                       |
| K12-3          | 28,938,152            | 15,549,498             | 53.73%          | 13,323,889             | 46.04%          | 0.9935                       |
| C12-1          | 22,023,606            | 10,963,417             | 49.78%          | 9,701,601              | 44.05%          | 0.9941                       |
| C12-2          | 15,850,790            | 8,864,492              | 55.93%          | 7,922,966              | 49.99%          | 0.9947                       |
| C12-3          | 11,834,929            | 6,237,128              | 52.70%          | 5,546,857              | 46.87%          | 0.9946                       |
| K48-1          | 28,004,316            | 18,815,975             | 67.19%          | 16,487,747             | 58.88%          | 0.9953                       |
| K48-2          | 17,661,910            | 11,229,908             | 63.58%          | 9,851,297              | 55.78%          | 0.9951                       |
| K48-3          | 27,158,740            | 15,643,356             | 57.60%          | 13,588,111             | 50.03%          | 0.9957                       |
| C48-1          | 40,636,120            | 26,365,750             | 64.88%          | 23,831,661             | 58.65%          | 0.9770                       |
| C48-2          | 26,993,657            | 13,344,752             | 49.44%          | 11,474,648             | 42.51%          | 0.9612                       |
| C48-3          | 32,525,963            | 18,944,019             | 58.24%          | 17,227,196             | 52.96%          | 0.9787                       |
| <b>Average</b> | <b>25,849,381</b>     | <b>14,801,814</b>      | <b>56.77%</b>   | <b>13,095,761</b>      | <b>50.17%</b>   | <b>0.9890</b>                |

610  
 611 Absolute number and percentages of reads aligned to the transcript file of the Berkeley  
 612 Drosophila Genome Project (BDGP) release 5.74. *n* Reads: number of raw reads; *n* Mapped  
 613 and % Mapped: number of reads mapping to the reference transcriptome with corresponding  
 614 percentage; *n* Unique and % Unique: number of reads mapping to a unique location in the  
 615 reference transcriptome with corresponding percentage; Average R<sup>2</sup>: average replicate  
 616 correlation (Pearson's correlation coefficient calculated across all genes with a non-zero read  
 617 count in at least one replicate).

618 **Table 4. Mapping metrics for third antennal segment transcriptomes collected after 96**  
 619 **hours of induction of Kir2.1 (K) or a non-conducting control (C)**

| ID             | <i>n</i> Reads    | <i>n</i> Mapped   | % Mapped      | <i>n</i> Unique   | % Unique      | Average R <sup>2</sup> |
|----------------|-------------------|-------------------|---------------|-------------------|---------------|------------------------|
| K96-1          | 31,213,542        | 25,030,748        | 80.19%        | 14,405,148        | 46.15%        | 0.9836                 |
| K96-2          | 55,190,242        | 43,522,921        | 78.86%        | 26,736,203        | 48.44%        | 0.9937                 |
| K96-3          | 58,556,838        | 47,205,802        | 80.62%        | 31,655,311        | 54.06%        | 0.9941                 |
| K96-4          | 29,803,652        | 24,632,464        | 82.65%        | 17,888,586        | 60.02%        | 0.9933                 |
| K96-5          | 28,647,909        | 23,564,548        | 82.26%        | 17,152,909        | 59.87%        | 0.9937                 |
| K96-6          | 31,030,362        | 23,420,613        | 75.48%        | 17,208,103        | 55.46%        | 0.9925                 |
| K96-7          | 26,014,249        | 21,066,849        | 80.98%        | 14,655,033        | 56.33%        | 0.9932                 |
| K96-8          | 30,622,108        | 24,934,568        | 81.43%        | 17,368,348        | 56.72%        | 0.9928                 |
| K96-9          | 35,563,235        | 27,845,191        | 78.30%        | 14,971,400        | 42.10%        | 0.9869                 |
| K96-10         | 26,388,734        | 21,106,014        | 79.98%        | 13,725,816        | 52.01%        | 0.9904                 |
| C96-1          | 29,748,012        | 24,036,358        | 80.80%        | 15,070,224        | 50.66%        | 0.9928                 |
| C96-2          | 61,127,179        | 48,487,739        | 79.32%        | 30,257,167        | 49.50%        | 0.9933                 |
| C96-3          | 58,864,472        | 49,116,496        | 83.44%        | 36,050,234        | 61.24%        | 0.9939                 |
| C96-4          | 30,582,966        | 25,278,565        | 82.66%        | 17,865,165        | 58.42%        | 0.9928                 |
| C96-5          | 27,223,175        | 22,593,695        | 82.99%        | 16,178,509        | 59.43%        | 0.9935                 |
| C96-6          | 29,951,768        | 24,706,089        | 82.49%        | 17,520,016        | 58.49%        | 0.9908                 |
| C96-7          | 32,514,120        | 26,933,883        | 82.84%        | 19,342,591        | 59.49%        | 0.9940                 |
| C96-8          | 27,902,225        | 23,365,715        | 83.74%        | 17,388,108        | 62.32%        | 0.9936                 |
| C96-9          | 28,058,965        | 21,639,543        | 77.12%        | 11,934,889        | 42.54%        | 0.9911                 |
| C96-10         | 28,737,234        | 23,114,269        | 80.43%        | 14,720,484        | 51.22%        | 0.9928                 |
| <b>Average</b> | <b>35,387,049</b> | <b>28,580,104</b> | <b>80.83%</b> | <b>19,104,712</b> | <b>54.22%</b> | <b>0.9921</b>          |

620  
 621 Absolute number and percentages of reads aligned to the transcript file of the Berkeley  
 622 Drosophila Genome Project (BDGP) release 5.74. *n* Reads: number of raw reads; *n* Mapped  
 623 and % Mapped: number of reads mapping to the reference transcriptome with corresponding  
 624 percentage; *n* Unique and % Unique: number of reads mapping to a unique location in the  
 625 reference transcriptome with corresponding percentage; Average R<sup>2</sup>: average replicate  
 626 correlation (Pearson's correlation coefficient calculated across all genes with a non-zero read  
 627 count in at least one replicate).

628 **Table 5. Differentially expressed genes after 12 hours of Kir2.1 induction (FDR-adjusted**  
 629  **$p < 0.20$ )**  
 630

| Gene               | Baseline expression | Log <sub>2</sub> fold change | $p$      | FDR      | Description                       |
|--------------------|---------------------|------------------------------|----------|----------|-----------------------------------|
| <i>CG11550</i>     | 7106.49             | -0.3861                      | 3.07E-06 | 4.71E-03 | lipid binding                     |
| <i>Rbfox1</i>      | 1799.04             | 0.3151                       | 3.22E-05 | 1.35E-02 | RNA binding                       |
| <i>Trc8</i>        | 885.38              | -0.5493                      | 5.29E-05 | 1.35E-02 | protein ubiquitination            |
| <i>baz</i>         | 2163.42             | 0.3019                       | 4.58E-05 | 1.35E-02 | cell polarity, junction formation |
| <i>Dso1</i>        | 91551.91            | -0.2967                      | 4.77E-05 | 1.35E-02 | immune response                   |
| <i>lncRNA: noe</i> | 89869.98            | 0.3187                       | 1.95E-05 | 1.35E-02 | no functional information         |
| <i>GstE3</i>       | 2132.39             | 0.3211                       | 2.19E-04 | 4.80E-02 | glutathione metabolism            |
| <i>hth</i>         | 11449.58            | 0.2245                       | 3.91E-04 | 6.65E-02 | brain development                 |
| <i>sff</i>         | 1232.13             | 0.4033                       | 3.58E-04 | 6.65E-02 | NMJ development                   |
| <i>plum</i>        | 981.88              | 0.4713                       | 4.66E-04 | 7.14E-02 | axon pruning                      |
| <i>CG11873</i>     | 977.85              | 0.3519                       | 6.28E-04 | 8.74E-02 | stress response, transcription    |
| <i>pros</i>        | 1847.93             | 0.3498                       | 9.49E-04 | 1.21E-01 | neuronal differentiation          |
| <i>Ank2</i>        | 4808.04             | 0.3167                       | 1.68E-03 | 1.30E-01 | membrane scaffolding              |
| <i>CG6421</i>      | 1256.69             | -0.3262                      | 1.70E-03 | 1.30E-01 | immune response                   |
| <i>Hcf</i>         | 801.97              | 0.5215                       | 1.44E-03 | 1.30E-01 | chromatic remodeling              |
| <i>Kr-h2</i>       | 805.79              | -0.3513                      | 1.59E-03 | 1.30E-01 | membrane organization             |
| <i>Pis</i>         | 1370.97             | 0.2670                       | 1.44E-03 | 1.30E-01 | signal transduction               |
| <i>crol</i>        | 1882.00             | 0.2505                       | 1.69E-03 | 1.30E-01 | cell adhesion                     |
| <i>sdt</i>         | 1635.14             | 0.3144                       | 1.52E-03 | 1.30E-01 | cell polarity, junction formation |
| <i>spz</i>         | 755.96              | 0.4628                       | 1.34E-03 | 1.30E-01 | axon guidance, immune response    |
| <i>Syp</i>         | 3782.12             | 0.2909                       | 1.84E-03 | 1.34E-01 | RNA binding, NMJ transmission     |
| <i>ATP6AP2</i>     | 1413.52             | -0.3679                      | 2.08E-03 | 1.45E-01 | axonal transport                  |
| <i>CG9171</i>      | 697.10              | 0.3263                       | 2.27E-03 | 1.45E-01 | O-linked mannosylation            |
| <i>RpL38</i>       | 9770.50             | -0.2603                      | 2.25E-03 | 1.45E-01 | translation                       |
| <i>mAcon1</i>      | 1385.07             | -0.3415                      | 2.80E-03 | 1.65E-01 | mitochondrial Krebs cycle         |
| <i>CG3907</i>      | 2306.39             | -0.2459                      | 2.75E-03 | 1.65E-01 | no functional information         |

631  
 632  $p$ , unadjusted  $p$ -value; FDR,  $p$ -value adjusted for multiple comparisons.

633 **Table 6. Differentially expressed genes after 48 hours of Kir2.1 induction (FDR-adjusted**  
 634 ***p* < 0.20)**  
 635

| Gene                  | Baseline expression | Log <sub>2</sub> fold change | <i>p</i> | FDR      | Description                        |
|-----------------------|---------------------|------------------------------|----------|----------|------------------------------------|
| <i>CG8620</i>         | 36.69               | 2.2870                       | 1.36E-09 | 1.27E-05 | no functional information          |
| <i>CG42502</i>        | 7610.35             | 0.7250                       | 7.72E-07 | 3.60E-03 | no functional information          |
| <i>Hsp27</i>          | 141.78              | 1.1780                       | 8.78E-06 | 2.73E-02 | HSP20-like chaperone               |
| <i>BomS3</i>          | 287.22              | 1.0470                       | 1.41E-05 | 3.28E-02 | immune response                    |
| <i>CR41619</i>        | 337.93              | 0.9580                       | 1.77E-05 | 3.30E-02 | no functional information          |
| <i>Fbp2</i>           | 49.24               | -1.3890                      | 3.64E-05 | 5.65E-02 | alcohol dehydrogenase              |
| <i>RpLP2</i>          | 13612.76            | 0.7030                       | 4.39E-05 | 5.84E-02 | structural constituent of ribosome |
| <i>Mst57Dc</i>        | 10.73               | -1.5090                      | 5.61E-05 | 5.91E-02 | mating behavior                    |
| <i>S-Lap4</i>         | 8.45                | -1.4820                      | 5.71E-05 | 5.91E-02 | proteolysis                        |
| <i>CG5986</i>         | 566.50              | 1.0110                       | 6.91E-05 | 6.44E-02 | RNA binding                        |
| <i>CG3224</i>         | 171.53              | 0.9550                       | 8.83E-05 | 7.48E-02 | ribosomal export                   |
| <i>CR31032</i>        | 31.67               | 1.4380                       | 1.04E-04 | 8.06E-02 | no functional information          |
| <i>Trx-2</i>          | 4120.04             | 0.6480                       | 1.12E-04 | 8.06E-02 | thioredoxin, oxidative stress      |
| <i>Cyp4g1</i>         | 46.34               | -1.5000                      | 1.23E-04 | 8.23E-02 | oxidation-reduction                |
| <i>CG7920</i>         | 1911.26             | -0.6730                      | 1.59E-04 | 8.23E-02 | acetyl CoA metabolism              |
| <i>Hsp67Bc</i>        | 54.45               | 1.3110                       | 1.51E-04 | 8.23E-02 | translation, protein folding       |
| <i>Jon65Aiv</i>       | 22.70               | -1.4610                      | 1.52E-04 | 8.23E-02 | proteolysis                        |
| <i>mRpS5</i>          | 722.02              | 0.7000                       | 1.52E-04 | 8.23E-02 | structural constituent of ribosome |
| <i>RpS3A</i>          | 31350.61            | 0.5610                       | 1.81E-04 | 8.89E-02 | structural constituent of ribosome |
| <i>Tsp39D</i>         | 1213.20             | 0.5520                       | 2.08E-04 | 9.69E-02 | cell membrane scaffolding          |
| <i>CG17454</i>        | 4301.55             | 0.5740                       | 3.44E-04 | 1.50E-01 | mRNA splicing                      |
| <i>CG6770</i>         | 41760.18            | 0.4970                       | 3.70E-04 | 1.50E-01 | transcriptional regulation         |
| <i>Pkd2</i>           | 10.79               | 1.3760                       | 3.58E-04 | 1.50E-01 | cation transport                   |
| <i>Hsp23</i>          | 141.98              | 1.0130                       | 4.67E-04 | 1.81E-01 | protein folding                    |
| <i>Obp99d</i>         | 176.07              | 1.0220                       | 5.51E-04 | 1.98E-01 | smell perception                   |
| <i>snRNA:U2:34ABa</i> | 106.57              | 1.3060                       | 5.49E-04 | 1.98E-01 | mRNA splicing                      |

636  
 637 *p*, unadjusted *p*-value; FDR, *p*-value adjusted for multiple comparisons.

638 **Table 7. Differentially expressed genes after 96 hours of Kir2.1 induction (FDR-adjusted**  
 639  **$p < 0.05$ )**  
 640

| Gene           | Baseline expression | Log <sub>2</sub> fold change | $p$      | FDR      | Description                    |
|----------------|---------------------|------------------------------|----------|----------|--------------------------------|
| <i>PGRP-SD</i> | 1238.04             | -1.6430                      | 3.48E-15 | 2.70E-11 | immune response                |
| <i>Dro</i>     | 126.09              | -2.7530                      | 2.58E-14 | 1.00E-10 | immune response                |
| <i>Hsp26</i>   | 339.18              | 1.2540                       | 4.48E-14 | 1.16E-10 | protein folding                |
| <i>pirk</i>    | 334.11              | -1.5010                      | 5.40E-12 | 1.05E-08 | immune response                |
| <i>Obp56a</i>  | 254.68              | -1.1930                      | 9.49E-10 | 1.48E-06 | smell perception               |
| <i>CG10332</i> | 160.81              | -2.0950                      | 1.48E-09 | 1.92E-06 | no functional information      |
| <i>CG42305</i> | 23576.53            | 1.0490                       | 3.47E-09 | 3.85E-06 | no functional information      |
| <i>Gr32a</i>   | 76.38               | -2.3570                      | 8.22E-09 | 7.99E-06 | smell perception               |
| <i>Hsp23</i>   | 102.45              | 1.4180                       | 6.87E-08 | 5.93E-05 | protein folding                |
| <i>ple</i>     | 2790.60             | -0.5390                      | 1.77E-07 | 1.38E-04 | tyrosine hydroxylase           |
| <i>CG42821</i> | 879.82              | -0.9580                      | 4.02E-07 | 2.84E-04 | no functional information      |
| <i>SiaT</i>    | 632.96              | -0.6810                      | 1.27E-06 | 8.23E-04 | NMJ development                |
| <i>BomS2</i>   | 73.43               | -1.1840                      | 1.73E-06 | 1.03E-03 | immune response                |
| <i>Hsp67Bc</i> | 115.73              | 1.2100                       | 2.45E-06 | 1.36E-03 | translation, protein folding   |
| <i>CG5346</i>  | 1828.19             | -0.5430                      | 3.64E-06 | 1.89E-03 | oxidation/reduction process    |
| <i>Jhe</i>     | 539.44              | -1.6050                      | 8.94E-06 | 4.35E-03 | hormone esterase activity      |
| <i>CG16700</i> | 884.33              | -0.3650                      | 1.18E-05 | 5.41E-03 | amino acid transporter         |
| <i>CG8303</i>  | 573.39              | -0.7870                      | 1.69E-05 | 7.29E-03 | fatty acyl-CoA metabolism      |
| <i>CG8788</i>  | 1213.87             | 0.4020                       | 2.57E-05 | 9.99E-03 | no functional information      |
| <i>Gmap</i>    | 4141.22             | -0.4680                      | 2.44E-05 | 9.99E-03 | vesicle-mediated transport     |
| <i>ZnT63C</i>  | 451.25              | -0.4730                      | 3.00E-05 | 1.11E-02 | Zinc transport                 |
| <i>Hnf4</i>    | 1345.62             | -0.3230                      | 4.59E-05 | 1.62E-02 | glucose homeostasis            |
| <i>CG12290</i> | 3289.24             | -0.3730                      | 5.63E-05 | 1.90E-02 | GPCR, rhodopsin-like           |
| <i>BomS1</i>   | 912.15              | -0.7730                      | 9.49E-05 | 3.07E-02 | immune response                |
| <i>CG18302</i> | 11179.04            | 0.3620                       | 1.02E-04 | 3.15E-02 | lipid metabolism               |
| <i>CG3301</i>  | 759.35              | 0.4310                       | 1.09E-04 | 3.15E-02 | steroid dehydrogenase          |
| <i>Mmp1</i>    | 5100.38             | -0.3990                      | 1.07E-04 | 3.15E-02 | cell adhesion                  |
| <i>AIF</i>     | 515.32              | -0.4530                      | 1.45E-04 | 3.93E-02 | apoptosis inducing factor      |
| <i>CG15890</i> | 1533.66             | -0.3050                      | 1.46E-04 | 3.93E-02 | transmembrane transporter      |
| <i>BomS3</i>   | 413.55              | -0.7560                      | 1.52E-04 | 3.94E-02 | immune response                |
| <i>Buffy</i>   | 355.39              | 0.4910                       | 1.85E-04 | 4.64E-02 | inhibits programmed cell death |
| <i>CG34456</i> | 604.69              | 0.5120                       | 2.06E-04 | 5.00E-02 | no functional information      |

641  
 642  $p$ , unadjusted  $p$ -value; FDR,  $p$ -value adjusted for multiple comparisons.

643  
644

**Table 8. Enriched GO biological process terms after 12 hours of Kir2.1 induction**

| GO id      | Term                                          | Annotated | Observed | Expected | Fisher's <i>p</i> |
|------------|-----------------------------------------------|-----------|----------|----------|-------------------|
| GO:0034330 | cell junction organization                    | 273       | 27       | 14       | 1.20E-03          |
| GO:0006887 | exocytosis                                    | 75        | 11       | 4        | 1.80E-03          |
| GO:0016079 | synaptic vesicle exocytosis                   | 44        | 8        | 2        | 1.90E-03          |
| GO:0035295 | tube development                              | 550       | 45       | 29       | 2.00E-03          |
| GO:0065008 | regulation of biological quality              | 888       | 66       | 47       | 2.20E-03          |
| GO:0060562 | epithelial tube morphogenesis                 | 373       | 33       | 20       | 2.40E-03          |
| GO:0007399 | nervous system development                    | 843       | 63       | 45       | 2.50E-03          |
| GO:0000209 | protein polyubiquitination                    | 58        | 9        | 3        | 3.20E-03          |
| GO:0035239 | tube morphogenesis                            | 400       | 34       | 21       | 3.90E-03          |
| GO:0007611 | learning or memory                            | 119       | 14       | 6        | 4.00E-03          |
| GO:0050890 | cognition                                     | 119       | 14       | 6        | 4.00E-03          |
| GO:1901565 | organonitrogen compound catabolic process     | 327       | 29       | 17       | 4.20E-03          |
| GO:0006836 | neurotransmitter transport                    | 95        | 12       | 5        | 4.20E-03          |
| GO:0010648 | negative regulation of cell communication     | 241       | 23       | 13       | 4.30E-03          |
| GO:0023057 | negative regulation of signaling              | 241       | 23       | 13       | 4.30E-03          |
| GO:0045055 | regulated exocytosis                          | 50        | 8        | 3        | 4.40E-03          |
| GO:0048519 | negative regulation of biological process     | 1047      | 74       | 56       | 4.40E-03          |
| GO:0042391 | regulation of membrane potential              | 51        | 8        | 3        | 5.00E-03          |
| GO:0048729 | tissue morphogenesis                          | 483       | 39       | 26       | 5.00E-03          |
| GO:0007610 | behavior                                      | 377       | 32       | 20       | 5.20E-03          |
| GO:0007269 | neurotransmitter secretion                    | 74        | 10       | 4        | 5.40E-03          |
| GO:0099643 | signal release from synapse                   | 74        | 10       | 4        | 5.40E-03          |
| GO:0034329 | cell junction assembly                        | 176       | 18       | 9        | 5.40E-03          |
| GO:0007613 | memory                                        | 86        | 11       | 5        | 5.50E-03          |
| GO:0051124 | synaptic growth at NMJ                        | 111       | 13       | 6        | 5.70E-03          |
| GO:0007416 | synapse assembly                              | 137       | 15       | 7        | 5.80E-03          |
| GO:0007528 | neuromuscular junction development            | 138       | 15       | 7        | 6.20E-03          |
| GO:0060429 | epithelium development                        | 730       | 54       | 39       | 6.40E-03          |
| GO:0008582 | regulation of synaptic growth at NMJ          | 88        | 11       | 5        | 6.50E-03          |
| GO:0050808 | synapse organization                          | 221       | 21       | 12       | 6.60E-03          |
| GO:0050803 | regulation of synapse structure or activity   | 139       | 15       | 7        | 6.60E-03          |
| GO:0048523 | negative regulation of cellular process       | 914       | 65       | 49       | 6.80E-03          |
| GO:0042752 | regulation of circadian rhythm                | 65        | 9        | 3        | 6.90E-03          |
| GO:0048569 | post-embryonic animal organ development       | 371       | 31       | 20       | 7.40E-03          |
| GO:0007267 | cell-cell signaling                           | 326       | 28       | 17       | 7.50E-03          |
| GO:0009888 | tissue development                            | 786       | 57       | 42       | 7.70E-03          |
| GO:0099003 | vesicle-mediated transport in synapse         | 78        | 10       | 4        | 7.80E-03          |
| GO:0099504 | synaptic vesicle cycle                        | 78        | 10       | 4        | 7.80E-03          |
| GO:0010646 | regulation of cell communication              | 595       | 45       | 32       | 8.70E-03          |
| GO:0023051 | regulation of signaling                       | 595       | 45       | 32       | 8.70E-03          |
| GO:0007163 | establishment or maintenance of cell polarity | 171       | 17       | 9        | 9.00E-03          |
| GO:0015672 | monovalent inorganic cation transport         | 92        | 11       | 5        | 9.10E-03          |
| GO:0030163 | protein catabolic process                     | 228       | 21       | 12       | 9.30E-03          |



|            |                                |     |    |    |          |
|------------|--------------------------------|-----|----|----|----------|
| GO:0002009 | morphogenesis of an epithelium | 470 | 37 | 25 | 9.30E-03 |
| GO:0006508 | proteolysis                    | 471 | 37 | 25 | 9.60E-03 |
| GO:1904396 | regulation of NMJ development  | 93  | 11 | 5  | 9.80E-03 |
| GO:0030100 | regulation of endocytosis      | 46  | 7  | 2  | 1.00E-02 |

645

646 Annotated, number of genes in the universe attached to a GO term; Observed, number of  
647 differentially expressed genes (unadjusted  $p < 0.05$ ) attached to a GO term; Expected, number  
648 of genes expected by chance to be attached to a GO term



649 **Table 9. Enriched GO biological process terms after 48 hours of Kir2.1 induction**

650  
651

| GO id      | Term                                                | Annotated | Observed | Expected | Fisher's <i>p</i> |
|------------|-----------------------------------------------------|-----------|----------|----------|-------------------|
| GO:0043603 | cellular amide metabolic process                    | 405       | 53       | 25       | 8.70E-08          |
| GO:0006518 | peptide metabolic process                           | 355       | 46       | 22       | 9.00E-07          |
| GO:0006412 | translation                                         | 265       | 37       | 16       | 1.90E-06          |
| GO:0043043 | peptide biosynthetic process                        | 293       | 39       | 18       | 3.40E-06          |
| GO:0043604 | amide biosynthetic process                          | 311       | 40       | 19       | 5.90E-06          |
| GO:0002181 | cytoplasmic translation                             | 100       | 18       | 6        | 3.30E-05          |
| GO:0140053 | mitochondrial gene expression                       | 86        | 15       | 5        | 2.10E-04          |
| GO:0032543 | mitochondrial translation                           | 79        | 13       | 5        | 9.90E-04          |
| GO:1901566 | organonitrogen compound biosynthetic process        | 554       | 52       | 34       | 1.28E-03          |
| GO:0015980 | energy derivation by oxidation of organic compounds | 54        | 10       | 3        | 1.50E-03          |

652  
653  
654  
655

Annotated, number of genes in the universe attached to a GO term; Observed, number of differentially expressed genes (unadjusted  $p < 0.05$ ) attached to a GO term; Expected, number of genes expected by chance to be attached to a GO term

656 **Table 10. Enriched GO biological process terms after 96 hours of Kir2.1 induction**  
657

| GO id      | Term                                         | Annotated | Observed | Expected | Fisher's <i>p</i> |
|------------|----------------------------------------------|-----------|----------|----------|-------------------|
| GO:0002181 | cytoplasmic translation                      | 100       | 28       | 8        | 5.50E-09          |
| GO:1903825 | organic acid transmembrane transport         | 42        | 11       | 4        | 4.90E-04          |
| GO:1905039 | carboxylic acid transmembrane transport      | 42        | 11       | 4        | 4.90E-04          |
| GO:0043603 | cellular amide metabolic process             | 405       | 53       | 34       | 5.70E-04          |
| GO:0043604 | amide biosynthetic process                   | 311       | 43       | 26       | 6.10E-04          |
| GO:0006412 | translation                                  | 265       | 38       | 22       | 6.30E-04          |
| GO:0006518 | peptide metabolic process                    | 355       | 47       | 30       | 9.10E-04          |
| GO:0055114 | oxidation-reduction process                  | 308       | 42       | 26       | 9.40E-04          |
| GO:0043043 | peptide biosynthetic process                 | 293       | 40       | 25       | 1.22E-03          |
| GO:0009617 | response to bacterium                        | 158       | 25       | 13       | 1.32E-03          |
| GO:0015711 | organic anion transport                      | 89        | 16       | 7        | 2.59E-03          |
| GO:0046942 | carboxylic acid transport                    | 59        | 12       | 5        | 3.03E-03          |
| GO:0015849 | organic acid transport                       | 60        | 12       | 5        | 3.51E-03          |
| GO:1901566 | organonitrogen compound biosynthetic process | 554       | 63       | 46       | 6.21E-03          |
| GO:0034220 | ion transmembrane transport                  | 160       | 23       | 13       | 6.94E-03          |
| GO:0098656 | anion transmembrane transport                | 58        | 11       | 5        | 7.74E-03          |
| GO:0006820 | anion transport                              | 118       | 18       | 10       | 8.80E-03          |

658  
659 Annotated, number of genes in the universe attached to a GO term; Observed, number of  
660 differentially expressed genes (unadjusted  $p < 0.05$ ) attached to a GO term; Expected, number  
661 of genes expected by chance to be attached to a GO term

662 **Table 11. Differentially expressed genes ( $p < 0.05$ ) attached to GO biological process**  
 663 **terms in the semantic grouping "transmitter release" after 12 hours of Kir2.1 induction**  
 664

| Gene             | Baseline expression | Log <sub>2</sub> fold change | <i>p</i> |
|------------------|---------------------|------------------------------|----------|
| <i>Ank2</i>      | 4808.04             | 0.3167                       | 1.68E-03 |
| <i>crol</i>      | 1882.00             | 0.2505                       | 1.69E-03 |
| <i>Syp</i>       | 3782.12             | 0.2909                       | 1.84E-03 |
| <i>ATP6AP2</i>   | 1413.52             | -0.3679                      | 2.08E-03 |
| <i>Pngl</i>      | 165.57              | -0.5711                      | 2.84E-03 |
| <i>Nsf2</i>      | 57.11               | 1.0758                       | 4.99E-03 |
| <i>sky</i>       | 574.22              | 0.4143                       | 5.49E-03 |
| <i>CG13796</i>   | 98.20               | 0.7603                       | 5.64E-03 |
| <i>rab3-GEF</i>  | 74.57               | 0.9719                       | 5.81E-03 |
| <i>Atpalpha</i>  | 25649.53            | 0.2121                       | 7.80E-03 |
| <i>rept</i>      | 43.03               | -0.9271                      | 1.06E-02 |
| <i>nSyb</i>      | 7467.28             | 0.1791                       | 1.25E-02 |
| <i>Cirl</i>      | 753.00              | 0.2911                       | 1.37E-02 |
| <i>Teh1</i>      | 490.53              | 0.3833                       | 1.47E-02 |
| <i>CG17278</i>   | 103.00              | -0.6499                      | 1.91E-02 |
| <i>Grd</i>       | 36.96               | -0.9307                      | 1.93E-02 |
| <i>Cby</i>       | 442.89              | -0.3202                      | 2.13E-02 |
| <i>Syx6</i>      | 229.68              | -0.4827                      | 2.22E-02 |
| <i>rl</i>        | 129.67              | 0.5579                       | 2.28E-02 |
| <i>Vha100-2</i>  | 1861.65             | -0.2887                      | 2.39E-02 |
| <i>eag</i>       | 1418.20             | 0.2192                       | 2.62E-02 |
| <i>NAATI</i>     | 301.63              | -0.3582                      | 2.92E-02 |
| <i>qvr</i>       | 751.52              | 0.2494                       | 2.93E-02 |
| <i>Rab5</i>      | 6457.41             | 0.1526                       | 3.09E-02 |
| <i>kto</i>       | 125.71              | 0.5835                       | 3.33E-02 |
| <i>Csp</i>       | 246.20              | -0.3718                      | 3.50E-02 |
| <i>Rdl</i>       | 9593.74             | 0.1719                       | 3.67E-02 |
| <i>para</i>      | 15702.82            | 0.1020                       | 3.70E-02 |
| <i>CASK</i>      | 2105.66             | 0.1889                       | 3.73E-02 |
| <i>stmA</i>      | 1105.17             | -0.2661                      | 4.04E-02 |
| <i>Hk</i>        | 1229.40             | 0.1803                       | 4.22E-02 |
| <i>disp</i>      | 51.74               | -0.7734                      | 4.23E-02 |
| <i>nonC</i>      | 55.67               | 0.7504                       | 4.33E-02 |
| <i>unc-13-4A</i> | 244.53              | 0.3676                       | 4.53E-02 |
| <i>Wnk</i>       | 233.48              | 0.4181                       | 4.57E-02 |
| <i>cpx</i>       | 9807.02             | 0.1367                       | 4.78E-02 |
| <i>sgg</i>       | 3797.38             | 0.1451                       | 4.83E-02 |
| <i>CG31030</i>   | 278.71              | 0.3348                       | 4.92E-02 |
| <i>dor</i>       | 43.31               | -0.7143                      | 4.99E-02 |

665

666 **Table 12. Differentially expressed genes ( $p < 0.05$ ) attached to GO biological process**  
 667 **terms in the semantic grouping "synapse remodeling" after 12 hours of Kir2.1 induction**  
 668

| Gene             | Baseline expression | Log <sub>2</sub> fold change | <i>p</i> |
|------------------|---------------------|------------------------------|----------|
| <i>Rbfox1</i>    | 1799.04             | 0.3151                       | 3.22E-05 |
| <i>baz</i>       | 2163.42             | 0.3019                       | 4.58E-05 |
| <i>sff</i>       | 1232.13             | 0.4033                       | 3.58E-04 |
| <i>plum</i>      | 981.88              | 0.4713                       | 4.66E-04 |
| <i>Piezo</i>     | 200.21              | -0.6974                      | 6.79E-04 |
| <i>pros</i>      | 1847.93             | 0.3498                       | 9.49E-04 |
| <i>spz</i>       | 755.96              | 0.4628                       | 1.34E-03 |
| <i>sdt</i>       | 1635.14             | 0.3144                       | 1.52E-03 |
| <i>ken</i>       | 135.28              | 0.6630                       | 2.10E-03 |
| <i>Su(dx)</i>    | 557.27              | -0.4424                      | 4.47E-03 |
| <i>krz</i>       | 352.41              | 0.4352                       | 4.47E-03 |
| <i>awd</i>       | 1639.43             | -0.3123                      | 4.61E-03 |
| <i>Patr-1</i>    | 38.20               | 1.0956                       | 6.97E-03 |
| <i>HDAC4</i>     | 3937.61             | 0.1914                       | 7.18E-03 |
| <i>alph</i>      | 1833.82             | 0.3419                       | 8.46E-03 |
| <i>jus</i>       | 1553.93             | -0.2206                      | 1.04E-02 |
| <i>Khc-73</i>    | 1436.43             | 0.2236                       | 1.07E-02 |
| <i>CG14806</i>   | 119.88              | 0.6016                       | 1.07E-02 |
| <i>Syn1</i>      | 224.74              | 0.4885                       | 1.60E-02 |
| <i>Med</i>       | 127.02              | -0.6286                      | 1.66E-02 |
| <i>pck</i>       | 104.18              | -0.6858                      | 1.71E-02 |
| <i>Ulp1</i>      | 140.50              | 0.6389                       | 1.91E-02 |
| <i>Ote</i>       | 25.41               | 1.0066                       | 1.92E-02 |
| <i>vsg</i>       | 1464.00             | -0.2474                      | 1.94E-02 |
| <i>hop</i>       | 663.22              | -0.1699                      | 2.02E-02 |
| <i>Nup75</i>     | 250.20              | 0.3893                       | 2.12E-02 |
| <i>scrib</i>     | 1348.95             | -0.2035                      | 2.65E-02 |
| <i>Adar</i>      | 479.31              | 0.3031                       | 2.78E-02 |
| <i>ci</i>        | 133.51              | -0.5603                      | 2.86E-02 |
| <i>Ect4</i>      | 958.87              | 0.2181                       | 2.95E-02 |
| <i>hiw</i>       | 264.24              | 0.3638                       | 3.48E-02 |
| <i>RhoGAP54D</i> | 9.86                | 1.1083                       | 3.48E-02 |
| <i>Gprk2</i>     | 635.86              | 0.3247                       | 3.50E-02 |
| <i>Ube3a</i>     | 161.07              | -0.4591                      | 3.51E-02 |
| <i>Nak</i>       | 219.26              | -0.4719                      | 3.60E-02 |
| <i>CG10188</i>   | 43.14               | -0.9196                      | 4.28E-02 |
| <i>CG18659</i>   | 166.96              | -0.4214                      | 4.41E-02 |
| <i>fnt</i>       | 983.41              | 0.2500                       | 4.52E-02 |
| <i>Mmp1</i>      | 3792.36             | 0.2127                       | 4.57E-02 |
| <i>CG5521</i>    | 26.02               | 0.9428                       | 4.65E-02 |
| <i>ex</i>        | 55.44               | 0.7311                       | 4.73E-02 |
| <i>CrebB</i>     | 1128.36             | 0.2159                       | 4.86E-02 |
| <i>EloB</i>      | 691.48              | -0.2662                      | 4.99E-02 |

669

670 **References**

671

672 Alexa A, Rahnenführer J, Lengauer T (2006) Improved scoring of functional groups from  
673 gene expression data by decorrelating GO graph structure. *Bioinformatics*, 22:1600–1607.

674

675 Andrews S (2010) FastQC: A quality control tool for high throughput sequence data.

676 <https://www.bioinformatics.babraham.ac.uk/projects/fastqc/>

677

678 Baas S, Sharrow M, Kotu V, Middleton M, Nguyen K, Flanagan-Steet H, Aoki K, Tiemeyer  
679 M (2011) Sugar-free frosting, a homolog of SAD kinase, drives neural-specific glycan  
680 expression in the *Drosophila* embryo. *Development*, 138:553–563.

681

682 Bacci A, Coco S, Pravettoni E, Schenk U, Armano S, Frassoni C, Verderio C, De Camilli P,  
683 Matteoli M (2001) Chronic blockade of glutamate receptors enhances presynaptic release and  
684 downregulates the interaction between synaptophysin-synaptobrevin-vesicle-associated  
685 membrane protein 2. *J Neurosci*, 21:6588–6596.

686

687 Bae H, Chen S, Roche JP, Ai M, Wu C, Diantonio A, Graf ER (2016) Rab3-GEF controls  
688 active zone development at the *Drosophila* neuromuscular junction. *eNeuro*, 3: e0031-  
689 16.2016.

690

691 Benton R, Vannice KS, Gomez-Diaz C, Vosshall LB (2009) Variant ionotropic glutamate  
692 receptors as chemosensory receptors in *Drosophila*. *Cell*, 136:149–162.

693

694 Bolger AM, Lohse M, Usadel B (2014) Trimmomatic: a flexible trimmer for Illumina  
695 sequence data. *Bioinformatics*, 30:2114–2120.  
696

697 Brionne A, Juanchich A, Hennequet-Antier C (2019) ViSEAGO: a Bioconductor package for  
698 clustering biological functions using Gene Ontology and semantic similarity. *BioData Min*,  
699 12:16.

700 Burrone J, O'Byrne M, Murthy VN (2002) Multiple forms of synaptic plasticity triggered by  
701 selective suppression of activity in individual neurons. *Nature*, 420:414–418.  
702

703 Cachero S, Gkantia M, Bates AS, Frechter S, Blackie L, McCarthy A, Sutcliffe B, Strano A,  
704 Aso Y, Jefferis GSXE (2020) BAcTrace, a tool for retrograde tracing of neuronal circuits in  
705 *Drosophila*. *Nat Methods*, <https://doi.org/10.1038/s41592-020-00989-1>  
706

707 Card JP, Rinaman L, Schwaber JS, Miselis RR, Whealy ME, Robbins AK, Enquist LW  
708 (1990) Neurotropic properties of pseudorabies virus: uptake and transneuronal passage in the  
709 rat central nervous system. *J Neurosci*, 10:1974–1994.  
710

711 Claridge-Chang A, Wijnen H, Naef F, Boothroyd C, Rajewsky N, Young MW (2001)  
712 Circadian regulation of gene expression systems in the *Drosophila* head. *Neuron*, 32:657–671.  
713

714 Clyne PJ, Warr CG, Freeman MR, Lessing D, Kim J, Carlson JR (1999) A novel family of  
715 divergent seven-transmembrane proteins: candidate odorant receptors in *Drosophila*. *Neuron*,  
716 22:327–338.  
717

- 718 Cull-Candy SG, Miledi R, Trautmann A, Uchitel OD (1980) On the release of transmitter at  
719 normal, myasthenia gravis and myasthenic syndrome affected human end-plates. *J Physiol*,  
720 299:621–638.
- 721
- 722 Davis GW, DiAntonio A, Petersen SA, Goodman CS (1998) Postsynaptic PKA controls  
723 quantal size and reveals a retrograde signal that regulates presynaptic transmitter release in  
724 *Drosophila*. *Neuron*, 20:305–315.
- 725
- 726 Davis GW, Müller M (2015) Homeostatic control of presynaptic neurotransmitter release.  
727 *Annual review of physiology*, 77:251–270.
- 728
- 729 DeNardo L, Luo L (2017) Genetic strategies to access activated neurons. *Curr Opin*  
730 *Neurobiol*, 45:121–129.
- 731
- 732 Desai NS, Rutherford LC, Turrigiano GG (1999) Plasticity in the intrinsic excitability of  
733 cortical pyramidal neurons. *Nat Neurosci*, 2:515–520.
- 734
- 735 Doe CQ, Chu-LaGraff Q, Wright DM, Scott MP (1991) The prospero gene specifies cell fates  
736 in the *Drosophila* central nervous system. *Cell*, 65:451–464.
- 737
- 738 Donlea JM, Pimentel D, Miesenböck G (2014) Neuronal machinery of sleep homeostasis in  
739 *Drosophila*. *Neuron*, 81:860–872.
- 740
- 741 Dubos A, Castells-Nobau A, Meziane H, Oortveld MA, Houbaert X, Iacono G, Martin C,  
742 Mittelhaeuser C, Lalanne V, Kramer JM, Bhukel A, Quentin C, Slabbert J, Verstreken P,

743 Sigrist SJ, Messaddeq N, Birling MC, Selloum M, Stunnenberg HG, Humeau Y, Schenck A  
744 et al. (2015) Conditional depletion of intellectual disability and Parkinsonism candidate gene  
745 ATP6AP2 in fly and mouse induces cognitive impairment and neurodegeneration. *Hum Mol*  
746 *Genet*, 24:6736–6755.

747

748 Frank CA, Kennedy MJ, Goold CP, Marek KW, Davis GW (2006) Mechanisms underlying  
749 the rapid induction and sustained expression of synaptic homeostasis. *Neuron*, 52:663–677.

750

751 Gao Q, Chess A (1999) Identification of candidate *Drosophila* olfactory receptors from  
752 genomic DNA sequence. *Genomics*, 60:31–9.

753

754 Geppert M, Goda Y, Stevens CF, Südhof TC (1997) The small GTP-binding protein Rab3A  
755 regulates a late step in synaptic vesicle fusion. *Nature*, 387:810–814.

756

757 Gerfen CR, O’Leary DD, Cowan WM (1982) A note on the transneuronal transport of  
758 wheat germ agglutinin-conjugated horseradish peroxidase in the avian and rodent visual  
759 systems. *Exp Brain Res*, 48:443–448.

760

761 Goold CP, Nicoll RA (2010) Single-cell optogenetic excitation drives homeostatic synaptic  
762 depression. *Neuron*, 68:512–528.

763

764 Goold CP, Davis GW (2007) The BMP ligand Gbb gates the expression of synaptic  
765 homeostasis independent of synaptic growth control. *Neuron*, 56:109–123.

766



767 Groschner LN, Miesenböck G (2019) Mechanisms of sensory discrimination: Insights from  
768 *Drosophila* olfaction. *Annu Rev Biophys*, 48:209–229.  
769  
770 Haghghi AP, McCabe BD, Fetter RD, Palmer JE, Hom S, Goodman CS (2003) Retrograde  
771 control of synaptic transmission by postsynaptic CaMKII at the *Drosophila* neuromuscular  
772 junction. *Neuron*, 39:255–267.  
773  
774 Halstead JM, Lin YQ, Durraine L, Hamilton RS, Ball G, Neely GG, Bellen HJ, Davis I (2014)  
775 Syncrip/hnRNP Q influences synaptic transmission and regulates BMP signaling at the  
776 *Drosophila* neuromuscular synapse. *Biol Open*, 3:839–849.  
777  
778 Haruna Y, Kobori A, Makiyama T, Yoshida H, Akao M, Doi T, Tsuji K, Ono S, Nishio Y,  
779 Shimizu W, Inoue T, Murakami T, Tsuboi N, Yamanouchi H, Ushinohama H, Nakamura Y,  
780 Yoshinaga M, Horigome H, Aizawa Y, Kita T, Horie M et al. (2007) Genotype-phenotype  
781 correlations of KCNJ2 mutations in Japanese patients with Andersen-Tawil syndrome. *Hum*  
782 *Mutat*, 28:208.  
783  
784 Haslbeck M, Weinkauff S, Buchner J (2019) Small heat shock proteins: Simplicity meets  
785 complexity. *J Biol Chem*, 294:2121–2132.  
786  
787 Heginbotham L, Lu Z, Abramson T, MacKinnon R (1994) Mutations in the K<sup>+</sup> channel  
788 signature sequence. *Biophys J*, 66:1061–1067.  
789

- 790 Huang TH, Niesman P, Arasu D, Lee D, De La Cruz AL, Callejas A, Hong EJ, Lois C (2017)  
791 Tracing neuronal circuits in transgenic animals by transneuronal control of transcription  
792 (TRACT). *Elife*, 6:e26975.  
793
- 794 Johns DC, Marx R, Mains RE, O'Rourke B, Marban E (1999) Inducible genetic suppression  
795 of neuronal excitability. *J Neurosci*, 19:1691–7.  
796
- 797 Joza N, Galindo K, Pospisilik JA, Benit P, Rangachari M, Kanitz EE, Nakashima Y, Neely  
798 GG, Rustin P, Abrams JM, Kroemer G, Penninger JM (2008) The molecular archaeology of a  
799 mitochondrial death effector: AIF in *Drosophila*. *Cell Death Differ*, 15:1009–1018.  
800
- 801 Kazama H, Wilson RI (2008) Homeostatic matching and nonlinear amplification at identified  
802 central synapses. *Neuron*, 58:401–413.  
803
- 804 Kim D, Pertea G, Trapnell C, Pimentel H, Kelley R, Salzberg SL (2013) TopHat2: accurate  
805 alignment of transcriptomes in the presence of insertions, deletions and gene fusions. *Genome*  
806 *Biol*, 14:R36.  
807
- 808 Kim SH, Ryan TA (2010) CDK5 serves as a major control point in neurotransmitter release.  
809 *Neuron*, 67:797–809.  
810
- 811 Koch I, Schwarz H, Beuchle D, Goellner B, Langegger M, Aberle H (2008) *Drosophila*  
812 Ankyrin 2 is required for synaptic stability. *Neuron*, 58:210–222.  
813
- 814 Kuypers HG, Ugolini G (1990) Viruses as transneuronal tracers. *Trends Neurosci*, 13:71–75.

815

816 Liu KS, Siebert M, Mertel S, Knoche E, Wegener S, Wichmann C, Matkovic T, Muhammad  
817 K, Depner H, Mettke C, Bückers J, Hell SW, Müller M, Davis GW, Schmitz D, Sigrist SJ  
818 (2011) RIM-binding protein, a central part of the active zone, is essential for neurotransmitter  
819 release. *Science*, 334:1565–1569.

820

821 Livak KJ, Schmittgen TD (2001) Analysis of relative gene expression data using real-time  
822 quantitative PCR and the  $2^{-\Delta\Delta CT}$  method. *Methods*, 25:402–408.

823

824 Love MI, Huber W, Anders S (2014) Moderated estimation of fold change and dispersion for  
825 RNA-seq data with DESeq2. *Genome Biol*, 15:550.

826

827 Marie B, Pym E, Bergquist S, Davis GW (2010) Synaptic homeostasis is consolidated by the  
828 cell fate gene gooseberry, a *Drosophila* pax3/7 homolog. *J Neurosci*, 30:8071–8082.

829

830 McCabe BD, Hom S, Aberle H, Fetter RD, Marques G, Haerry TE, Wan H, O'Connor MB,  
831 Goodman CS, Haghighi AP (2004) Highwire regulates presynaptic BMP signaling essential  
832 for synaptic growth. *Neuron*, 41:891–905.

833

834 McDonald MJ, Rosbash M (2001) Microarray analysis and organization of circadian gene  
835 expression in *Drosophila*. *Cell*, 107:567–578.

836

837 McGuire SE, Le PT, Osborn AJ, Matsumoto K, Davis RL (2003) Spatiotemporal rescue of  
838 memory dysfunction in *Drosophila*. *Science*, 302:1765–1768.

839

- 840 Miesenböck G, Kevrekidis IG (2005) Optical imaging and control of genetically designated  
841 neurons in functioning circuits. *Annu Rev Neurosci*, 28:533–563.  
842
- 843 Morgan JI, Curran T (1991) Stimulus-transcription coupling in the nervous system:  
844 involvement of the inducible proto-oncogenes fos and jun. *Annu Rev Neurosci*, 14:421–451.  
845
- 846 Mosca TJ, Luo L (2014) Synaptic organization of the *Drosophila* antennal lobe and its  
847 regulation by the Teneurins. *eLife*, 3:e03726.  
848
- 849 Müller M, Liu KS, Sigrist SJ, Davis GW (2012) RIM controls homeostatic plasticity through  
850 modulation of the readily-releasable vesicle pool. *J Neurosci*, 32:16574–16585.  
851
- 852 Müller M, Pym EC, Tong A, Davis GW (2011) Rab3-GAP controls the progression of  
853 synaptic homeostasis at a late stage of vesicle release. *Neuron*, 69:749–762.  
854
- 855 Nitabach MN, Blau J, Holmes TC (2002) Electrical silencing of *Drosophila* pacemaker  
856 neurons stops the free-running circadian clock. *Cell*, 109:485–495.  
857
- 858 Paradis S, Sweeney ST, Davis GW (2001) Homeostatic control of presynaptic release is  
859 triggered by postsynaptic membrane depolarization. *Neuron*, 30:737–749.  
860
- 861 Petersen SA, Fetter RD, Noordermeer JN, Goodman CS, DiAntonio A (1997) Genetic  
862 analysis of glutamate receptors in *Drosophila* reveals a retrograde signal regulating  
863 presynaptic transmitter release. *Neuron*, 19:1237–1248.  
864

865 Pfeiffer BD, Ngo T-TB, Hibbard KL, Murphy C, Jenett A, Truman JW, Rubin GM (2010)  
866 Refinement of tools for targeted gene expression in *Drosophila*. *Genetics*, 186:735–755.  
867  
868 Pielage J, Cheng L, Fetter RD, Carlton PM, Sedat JW, Davis GW (2008) A presynaptic giant  
869 ankyrin stabilizes the NMJ through regulation of presynaptic microtubules and transsynaptic  
870 cell adhesion. *Neuron*, 58:195–209.  
871 Quinn L, Coombe M, Mills K, Daish T, Colussi P, Kumar S, Richardson H (2003) Buffy, a  
872 *Drosophila* Bcl-2 protein, has anti-apoptotic and cell cycle inhibitory functions. *EMBO J*,  
873 22:3568–3579.  
874  
875 Renn SCP, Park JH, Rosbash M, Hall JC, Taghert PH (1999) A pdf neuropeptide gene  
876 mutation and ablation of PDF neurons each cause severe abnormalities of behavioral  
877 circadian rhythms in *Drosophila*. *Cell*, 99:791–802.  
878  
879 Ruda M, Coulter JD (1982) Axonal and transneuronal transport of wheat germ agglutinin  
880 demonstrated by immunocytochemistry. *Brain Res*, 249:237–246.  
881  
882 Ruiz-Canada C, Ashley J, Moeckel-Cole S, Drier E, Yin J, Budnik V (2004) New synaptic  
883 bouton formation is disrupted by misregulation of microtubule stability in aPKC mutants.  
884 *Neuron*, 42:567–580.  
885  
886 Samuels BA, Hsueh YP, Shu T, Liang H, Tseng HC, Hong CJ, Su SC, Volker J, Neve RL,  
887 Yue DT, Tsai LH (2007) Cdk5 promotes synaptogenesis by regulating the subcellular  
888 distribution of the MAGUK family member CASK. *Neuron*, 56:823–837.  
889

- 890 Sandrock AW, Dryer SE, Rosen KM, Gozani SN, Kramer R, Theill LE, Fischbach GD (1997)  
891 Maintenance of acetylcholine receptor number by neuregulins at the neuromuscular junction  
892 in vivo. *Science*, 276:599–603.  
893
- 894 Schoch S, Castillo PE, Jo T, Mukherjee K, Geppert M, Wang Y, Schmitz F, Malenka RC,  
895 Südhof TC (2002) RIM1alpha forms a protein scaffold for regulating neurotransmitter release  
896 at the active zone. *Nature*, 415:321–326.  
897
- 898 Schwab ME, Suda K, Thoenen H (1979) Selective retrograde transsynaptic transfer of a  
899 protein, tetanus toxin, subsequent to its retrograde axonal transport. *J Cell Biol*, 82:798–810.  
900
- 901 Scott K, Brady R, Cravchik A, Morozov P, Rzhetsky A, Zuker C, Axel R (2001) A  
902 chemosensory gene family encoding candidate gustatory and olfactory receptors in  
903 *Drosophila*. *Cell*, 104:661–673.  
904
- 905 Seeburg DP, Feliu-Mojer M, Gaiottino J, Pak DT, Sheng M (2008) Critical role of CDK5 and  
906 Polo-like kinase 2 in homeostatic synaptic plasticity during elevated activity. *Neuron*, 58:571–  
907 583.  
908
- 909 Sjulson L, Cassataro D, DasGupta S, Miesenböck G (2016) Cell-specific targeting of  
910 genetically encoded tools for neuroscience. *Annu Rev Genet*, 50:571–594.  
911
- 912 Söllner T, Whiteheart SW, Brunner M, Erdjument-Bromage H, Geromanos S, Tempst P,  
913 Rothman JE (1993) SNAP receptors implicated in vesicle targeting and fusion. *Nature*,  
914 362:318–324.

915

916 Stocker RF, Heimbeck G, Gendre N, de Belle JS (1997) Neuroblast ablation in *Drosophila*  
917 P[GAL4] lines reveals origins of olfactory interneurons. *J Neurobiol*, 32:443–456.

918

919 Strack AM, Loewy AD (1990) Pseudorabies virus: a highly specific transneuronal cell body  
920 marker in the sympathetic nervous system. *J Neurosci*, 10:2139–2147.

921

922 Sutcliffe B, Forero MG, Zhu B, Robinson IM, Hidalgo A (2013) Neuron-type specific  
923 functions of DNT1, DNT2 and Spz at the *Drosophila* neuromuscular junction. *PLoS ONE*,  
924 8:e75902.

925

926 Talay M, Richman EB, Snell NJ, Hartmann GG, Fisher JD, Sorkaç A, Santoyo JF, Chou-  
927 Freed C, Nair N, Johnson M, Szymanski JR, Barnea G (2017) Transsynaptic mapping of  
928 second-order taste neurons in flies by trans-Tango. *Neuron*, 96:783–795.e4.

929

930 Thiagarajan TC, Lindskog M, Tsien RW (2005) Adaptation to synaptic inactivity in  
931 hippocampal neurons. *Neuron*, 47:725–737.

932

933 Trapnell C, Roberts A, Goff L, Pertea G, Kim D, Kelley DR, Pimentel H, Salzberg SL, Rinn  
934 JL, Pachter L (2012) Differential gene and transcript expression analysis of RNA-seq  
935 experiments with TopHat and Cufflinks. *Nat Protoc*, 7:562–578.

936

937 Tsurudome K, Tsang K, Liao EH, Ball R, Penney J, Yang JS, Elazzouzi F, He T, Chishti A,  
938 Lnenicka G, Lai EC, Haghghi AP (2010) The *Drosophila* miR-310 cluster negatively  
939 regulates synaptic strength at the neuromuscular junction. *Neuron*, 68:879–893.

940

941 Turrigiano G (2011) Too many cooks? Intrinsic and synaptic homeostatic mechanisms in  
942 cortical circuit refinement. *Annu Rev Neurosci*, 34:89–103.

943

944 Turrigiano G, Abbott LF, Marder E (1994) Activity-dependent changes in the intrinsic  
945 properties of cultured neurons. *Science*, 264:974–977.

946

947 Turrigiano GG, Leslie KR, Desai NS, Rutherford LC, Nelson SB (1998) Activity-dependent  
948 scaling of quantal amplitude in neocortical neurons. *Nature*, 391:892–896.

949

950 Valanne S, Wang J-H, Rämet M (2011) The *Drosophila* Toll signaling pathway. *J Immunol*,  
951 186:649–656.

952

953 Vosshall LB, Amrein H, Morozov PS, Rzhetsky A, Axel R (1999) A spatial map of olfactory  
954 receptor expression in the *Drosophila* antenna. *Cell*, 96:725–736.

955

956 Wang HD, Kazemi-Esfarjani P, Benzer S (2004) Multiple-stress analysis for isolation of  
957 *Drosophila* longevity genes. *Proc Natl Acad Sci U S A*, 101:12610–12615.

958

959 Wang JZ, Du Z, Payattakool R, Yu PS, Chen CF (2007) A new method to measure the  
960 semantic similarity of GO terms. *Bioinformatics*, 23:1274–1281.

961

962 Wickersham IR, Lyon DC, Barnard RJO, Mori T, Finke S, Conzelmann K-K, Young JAT,  
963 Callaway EM (2007) Monosynaptic restriction of transsynaptic tracing from single,  
964 genetically targeted neurons. *Neuron*, 53:639–647.



965

966 Wierenga CJ, Ibata K, Turrigiano GG (2005) Postsynaptic expression of homeostatic

967 plasticity at neocortical synapses. *J Neurosci*, 25:2895–2905.

968

969 Yu XM, Gutman I, Mosca TJ, Iram T, Ozkan E, Garcia KC, Luo L, Schuldiner O (2013)

970 Plum, an immunoglobulin superfamily protein, regulates axon pruning by facilitating TGF- $\beta$

971 signaling. *Neuron*, 78:456–468.

972
